# Supplementary material for: Policies to prevent zoonotic spillover: a systematic scoping review of evaluative evidence
Source: PubMed Central journal article supplement (PMC10634115; doi:10.1186/s12992-023-00986-x), 2023-11-08
Supplement: 12992_2023_986_MOESM1_ESM.pdf [file 12992_2023_986_MOESM1_ESM.pdf]

## Supplementary File 5

*Results for quality assessment using tool informed by Dixon-Woods et al.*

| Author                | Year | Fatally flawed?<br>(yes/no - based<br>on criteria<br>assessment<br>and relevance) | Clarity of aims and<br>objectives<br>(High/med/low) | Appropriateness of<br>research design<br>(High/med/low) | Clarity of research<br>process<br>(High/med/low) | Appropriateness<br>and clarity of<br>analysis<br>(High/med/low) | Sufficiency of data<br>to support<br>interpretations<br>and conclusions<br>(High/med/low) | Relevance<br>to the<br>research<br>question<br>(high,<br>medium,<br>low) |
|-----------------------|------|-----------------------------------------------------------------------------------|-----------------------------------------------------|---------------------------------------------------------|--------------------------------------------------|-----------------------------------------------------------------|-------------------------------------------------------------------------------------------|--------------------------------------------------------------------------|
| Abbas                 | 2014 | No                                                                                | Medium                                              | Medium                                                  | High                                             | Medium                                                          | High                                                                                      | High                                                                     |
| Kung                  | 2013 | No                                                                                | Medium                                              | High                                                    | Medium                                           | High                                                            | High                                                                                      | Medium                                                                   |
| Häsler                | 2012 | No                                                                                | Medium                                              | High                                                    | High                                             | High                                                            | High                                                                                      | Medium                                                                   |
| Horigan               | 2019 | No                                                                                | High                                                | High                                                    | Medium                                           | High                                                            | High                                                                                      | High                                                                     |
| Ivančo Naletoski      | 2010 | No                                                                                | High                                                | High                                                    | High                                             | Medium                                                          | High                                                                                      | High                                                                     |
| R. Vivancos           | 2008 | No                                                                                | High                                                | High                                                    | High                                             | High                                                            | High                                                                                      | High                                                                     |
| Catherine<br>Brinkley | 2018 | No                                                                                | High                                                | High                                                    | High                                             | High                                                            | High                                                                                      | High                                                                     |
| Lauterbach            | 2020 | No                                                                                | High                                                | High                                                    | High                                             | High                                                            | High                                                                                      | High                                                                     |
| Tustin                | 2011 | No                                                                                | High                                                | High                                                    | Medium                                           | Medium                                                          | High                                                                                      | High                                                                     |
| Swayne                | 2011 | No                                                                                | Medium                                              | High                                                    | High                                             | High                                                            | High                                                                                      | High                                                                     |
| Turkson               | 2016 | No                                                                                | Medium                                              | High                                                    | Medium                                           | Medium                                                          | High                                                                                      | Medium                                                                   |
| Guerrier              | 2012 | No                                                                                | High                                                | High                                                    | High                                             | High                                                            | High                                                                                      | High                                                                     |
| Akunzule              | 2019 | No                                                                                | Medium                                              | Medium                                                  | Medium                                           | Medium                                                          | High                                                                                      | High                                                                     |
| Brooks-Moizer         | 2009 | No                                                                                | High                                                | High                                                    | High                                             | High                                                            | High                                                                                      | Medium                                                                   |
| Knight-Jones          | 2011 | No                                                                                | High                                                | Medium                                                  | High                                             | High                                                            | High                                                                                      | High                                                                     |
| Lin                   | 2017 | No                                                                                | High                                                | High                                                    | High                                             | High                                                            | High                                                                                      | Medium                                                                   |
| De Serres             | 2009 | No                                                                                | High                                                | High                                                    | High                                             | High                                                            | High                                                                                      | High                                                                     |
| Shwiff                | 2009 | No                                                                                | High                                                | High                                                    | High                                             | High                                                            | High                                                                                      | High                                                                     |
| Massey                | 2011 | No                                                                                | High                                                | High                                                    | Medium                                           | High                                                            | High                                                                                      | High                                                                     |

|               |      |    |        |        |        |        |        |        |
|---------------|------|----|--------|--------|--------|--------|--------|--------|
| Huang         | 2017 | No | Medium | High   | High   | High   | High   | Medium |
| Hunter        | 2014 | No | Medium | Medium | High   | High   | High   | Medium |
| Karki         | 2015 | No | High   | High   | Medium | High   | High   | High   |
| Kangas        | 2007 | No | High   | High   | Medium | High   | High   | High   |
| Stewart       | 2017 | No | High   | High   | High   | High   | High   | High   |
| Manyweathers  | 2017 | No | High   | High   | High   | High   | High   | High   |
| Bonwitt       | 2018 | No | High   | High   | High   | High   | High   | Medium |
| Karabozhilova | 2012 | No | High   | Medium | Medium | High   | Medium | High   |
| Sanchez       | 2020 | No | High   | High   | High   | High   | High   | High   |
| Yee           | 2008 | No | High   | High   | Medium | High   | High   | High   |
| Huot          | 2008 | No | High   | High   | Medium | High   | High   | High   |
| Manyweathers  | 2017 | No | High   | High   | High   | High   | High   | High   |
| Davies        | 2019 | No | High   | High   | High   | High   | High   | High   |
| Gravier       | 2009 | No | High   | High   | High   | High   | High   | High   |
| Thomas        | 2013 | No | High   | High   | Medium | High   | High   | High   |
| Gordon        | 2005 | No | High   | High   | High   | High   | High   | High   |
| Mendez        | 2014 | No | High   | High   | High   | High   | Medium | High   |
| Okello        | 2018 | No | High   | Medium | High   | High   | Low    | Medium |
| Lu            | 2009 | No | High   | Medium | High   | High   | High   | High   |
| Rasouli       | 2009 | No | High   | High   | High   | High   | High   | High   |
| Wilson        | 2001 | No | High   | High   | Low    | Medium | High   | High   |
