# Supplementary material for: Policies to prevent zoonotic spillover: a systematic scoping review of evaluative evidence
Source: PubMed Central journal article supplement (PMC10634115; doi:10.1186/s12992-023-00986-x), 2023-11-08
Supplement: 12992_2023_986_MOESM2_ESM.pdf [file 12992_2023_986_MOESM2_ESM.pdf]

Supplementary File 4

Visualisation of study quality assessment using ROBINS-I

|    |  | Risk of bias domains |    |    |    |    |    |    |         |
|----|--|----------------------|----|----|----|----|----|----|---------|
|    |  | D1                   | D2 | D3 | D4 | D5 | D6 | D7 | Overall |
| 1  |  | ⊗                    | -  | +  | +  | +  | +  | +  | ⊗       |
| 2  |  | ⊗                    | -  | +  | +  | +  | +  | +  | ⊗       |
| 3  |  | -                    | +  | +  | +  | +  | +  | +  | -       |
| 4  |  | -                    | +  | +  | +  | +  | +  | +  | -       |
| 5  |  | -                    | +  | +  | +  | +  | +  | +  | -       |
| 6  |  | -                    | -  | +  | +  | +  | +  | +  | -       |
| 7  |  | -                    | +  | +  | +  | +  | +  | +  | -       |
| 8  |  | -                    | +  | +  | +  | +  | +  | +  | -       |
| 9  |  | -                    | +  | +  | +  | +  | +  | +  | -       |
| 10 |  | -                    | +  | +  | +  | +  | +  | +  | -       |
| 11 |  | -                    | +  | +  | +  | +  | +  | +  | -       |
| 12 |  | -                    | +  | +  | +  | !  | +  | +  | !       |
| 13 |  | -                    | +  | +  | +  | +  | +  | +  | -       |
| 14 |  | -                    | +  | +  | +  | +  | -  | +  | -       |
| 15 |  | ⊗                    | +  | +  | +  | +  | +  | +  | ⊗       |
| 16 |  | -                    | +  | +  | +  | +  | +  | +  | -       |
| 17 |  | -                    | +  | +  | +  | +  | +  | +  | -       |
| 18 |  | -                    | +  | +  | +  | +  | +  | +  | -       |
| 19 |  | -                    | +  | +  | +  | +  | +  | +  | -       |
| 20 |  | -                    | +  | +  | +  | +  | +  | +  | -       |
| 21 |  | -                    | +  | +  | +  | +  | +  | +  | -       |
| 22 |  | -                    | +  | +  | +  | +  | +  | +  | -       |
| 23 |  | -                    | +  | +  | +  | +  | +  | +  | -       |
| 24 |  | -                    | +  | +  | +  | +  | +  | +  | -       |
| 25 |  | -                    | +  | +  | +  | +  | +  | +  | -       |

Study

|    |   |   |   |   |   |   |   |   |
|----|---|---|---|---|---|---|---|---|
| 26 | - | + | + | + | + | + | + | - |
| 27 | - | + | + | + | + | + | + | - |
| 28 | - | + | + | + | + | + | + | - |
| 29 | - | + | + | + | + | + | + | - |
| 30 | - | + | + | + | + | + | + | - |
| 31 | - | + | + | + | + | + | + | - |
| 32 | - | + | + | + | + | + | + | - |
| 33 | - | + | + | + | + | + | + | - |
| 34 | - | + | + | + | + | + | + | - |
| 35 | X | + | + | + | + | + | + | X |
| 36 | - | + | + | + | + | + | + | - |
| 37 | - | + | + | + | + | + | + | - |
| 38 | - | - | + | + | + | - | + | X |
| 39 | - | + | + | + | + | + | + | - |
| 40 | - | + | + | + | + | + | + | - |
| 41 | X | - | + | + | + | - | + | X |
| 42 | - | + | + | + | + | + | + | - |
| 43 | - | - | + | + | + | + | + | - |
| 44 | - | + | + | + | + | + | + | - |

Domains:

- D1: Bias due to confounding.
- D2: Bias due to selection of participants.
- D3: Bias in classification of interventions.
- D4: Bias due to deviations from intended interventions.
- D5: Bias due to missing data.
- D6: Bias in measurement of outcomes.
- D7: Bias in selection of the reported result.

Judgement

- Critical
- Serious
- Moderate
- Low

Visualisation generated using the *robvis* R package and Shiny web app:

McGuinness, LA, Higgins, JPT. Risk-of-bias VISualization (robvis): An R package and Shiny web app for visualizing risk-of-bias assessments. *Res Syn Meth.* 2020; 1- 7.

<https://doi.org/10.1002/jrsm.1411>

*Key to study numbers in ROBINS-I visualisation*

Study

| Study number | Study title                                                                                                                                                                                                     |
|--------------|-----------------------------------------------------------------------------------------------------------------------------------------------------------------------------------------------------------------|
| 1            | Closure of live bird markets leads to the spread of H7N9 influenza in China                                                                                                                                     |
| 2            | Shifting brucellosis risk in livestock coincides with spreading seroprevalence in elk                                                                                                                           |
| 3            | Impact of the implementation of rest days in live bird markets on the dynamics of H5N1 highly pathogenic avian influenza                                                                                        |
| 4            | The Impact of a Monthly Rest Day on Avian Influenza Virus Isolation Rates in Retail Live Poultry Markets in Hong Kong                                                                                           |
| 5            | The persistence of multiple strains of avian influenza in live bird markets                                                                                                                                     |
| 6            | Protection of wetlands as a strategy for reducing the spread of avian influenza from migratory waterfowl                                                                                                        |
| 7            | Effect of closure of live poultry markets on poultry-to-person transmission of avian influenza A H7N9 virus: an ecological study                                                                                |
| 8            | A Bayesian Approach to Quantifying the Effects of Mass Poultry Vaccination upon the Spatial and Temporal Dynamics of H5N1 in Northern Vietnam                                                                   |
| 9            | A little goes a long way: Weak vaccine transmission facilitates oral vaccination campaigns against zoonotic pathogens                                                                                           |
| 10           | A Moderateeling study of human infections with avian influenza A H7N9 virus in mainland China                                                                                                                   |
| 11           | A Network Control Theory Approach to Moderateeling and Optimal Control of Zoonoses: Case Study of Brucellosis Transmission in Sub-Saharan Africa                                                                |
| 12           | A retrospective study of anthrax on the Ghaap Plateau, Northern Cape province of South Africa, with special reference to the 2007–2008 outbreaks                                                                |
| 13           | An evaluation of the efficiency of rabies control strategies in fox ( <i>Vulpes Tulpes</i> ) populations using a computer simulation program                                                                    |
| 14           | Application of a healthy food markets guide to two Indonesian markets to reduce transmission of “avian flu”                                                                                                     |
| 15           | Assessing the rabies control and surveillance systems in Brazil: An experience of measures toward bats after the halt of massive vaccination of dogs and cats in Campinas, Sao Paulo                            |
| 16           | Assessment and simulation of the implementation of brucellosis control programme in an endemic area of the Middle East                                                                                          |
| 17           | Evaluation of the Efficacy of Intervention Measures and Vaccination for the Control of LPAI Epidemics in Verona Province (Veneto, Italy)                                                                        |
| 18           | Public Health Benefits from Livestock Rift Valley Fever Control: A Simulation of Two Epidemics in Kenya                                                                                                         |
| 19           | The European trade ban on wild birds reduced invasion risks Laura                                                                                                                                               |
| 20           | Effect of Live Poultry Market Closure on Avian Influenza A (H7N9) Virus Activity in Guangzhou, China, 2014                                                                                                      |
| 21           | A Simulation-Based Evaluation of Premovement Active Surveillance Protocol Options for the Managed Movement of Turkeys to Slaughter During an Outbreak of Highly Pathogenic Avian Influenza in the United States |
| 22           | Assessment of Effectiveness of Control Strategies Against Simulated Outbreaks of Highly Pathogenic Avian Influenza in Ontario, Canada                                                                           |

- 23 Economic Evaluation of Vampire Bat (*DesModerateus rotundus*) Rabies Prevention in Mexico
- 24 Highly pathogenic avian influenza H5N8 in south-west France 2016–2017: A Moderateeling study of control strategies
- 25 Poultry Market Closures and Human Infection with Influenza A(H7N9) Virus, China, 2013–14
- 26 Environmental Sampling for Avian Influenza A (H7N9) in Live-Poultry Markets in Guangdong, China
- 27 Metapopulation dynamics of rabies and the efficacy of vaccination
- 28 Transmission potential of influenza A/H7N9, February to May 2013, China
- 29 Controlling highly pathogenic avian influenza outbreaks: An epidemiological and economic Moderateeel analysis
- 30 Moderateelling the effectiveness and risks of vaccination strategies to control classical swine fever epidemics
- 31 Moderateelling influenza A H5N1 vaccination strategy scenarios in the household poultry sector in Egypt
- 32 A mathematical Moderateeel for the control of diseases in wildlife populations: culling, vaccination and fertility control
- 33 Contact reduction from live-poultry market closures limit the epidemic of human infection with H7N9
- 34 Different intervention strategies toward live poultry markets against avian influenza
- 35 Effects of closures of live poultry markets on poultry-to-person transmission of avian influenza A H7N9; an ecological study
- 36 Effect of intervention on the control of Highly Pathogenic Avian Influenza in Nigeria
- 37 Effectiveness of Live Poultry Market Interventions on Human Infection and Avian Influenza A (H7N9) Virus, China
- 38 Rift Valley Fever Virus in Egyptian Cattle and their Prevention
- 39 Quantitative Risk Assessment of the Introduction of Rabies into Japan Through Illegal Landing of Dogs from Russian Fishing Boats in the Ports of Hokkaido, Japan
- 40 Managing the Risk of Wildlife Disease Introduction: Pathway Level Biosecurtiy for Preventing the Introduction of Alien Ranaviruses
- 41 Live Poultry Market Closures and Avian Influenza A (H7N9) Infection in Cities in China 2013-2017
- 42 Interventions for Avian Influenza A (H5N1) Risk Management in Live Bird Market Networks
- 43 Effect of closure of live poultry marketes in China on prevention and control of human infection with H7N9 avian influenza: A case study of four cities in Jiangu Province
- 44 Assessing reappearance factors of H7N9 avian influenza in China
