# Supplementary material for: Policies to prevent zoonotic spillover: a systematic scoping review of evaluative evidence
Source: PubMed Central journal article supplement (PMC10634115; doi:10.1186/s12992-023-00986-x), 2023-11-08
Supplement: 12992_2023_986_MOESM3_ESM.pdf [file 12992_2023_986_MOESM3_ESM.pdf]

## Supplementary File 3

### Characteristics of included evaluations

| First author | Year | Country   | Disease(s)                                                             | Intervention sector       | Implementation date                                                                                                                                            | Policy type                                                     | Spillover pathway                                | Policy level | Governance sector                            | Study design       | Key variables or concepts (Policy impact: direction of impact on outcome (+/-/=))                                                                                 |
|--------------|------|-----------|------------------------------------------------------------------------|---------------------------|----------------------------------------------------------------------------------------------------------------------------------------------------------------|-----------------------------------------------------------------|--------------------------------------------------|--------------|----------------------------------------------|--------------------|-------------------------------------------------------------------------------------------------------------------------------------------------------------------|
| Li (1)       | 2018 | China     | H7N9 (Avian influenza)                                                 | Retail                    | Various local closures March 2013-March 2014                                                                                                                   | Market closure                                                  | Human exposure                                   | Local        | Health                                       | Natural experiment | Human cases near closed markets (-); transportation of animals (+); human cases near other markets (+); price of broiler chickens near closed markets (-)         |
| Abbas (2)    | 2014 | Djibouti  | BSE; Rift valley fever; brucellosis; contagious bovine pleuropneumonia | Trade                     | 2007/2008 - following 2001/2002 outbreak, there was a ban on trade. However, trade ban was lifted in 2007 after efforts described in article were implemented. | Animal quarantine (testing, prophylaxis, treatment and culling) | Pathogen prevalence in domesticated animals      | Regional     | Animal health                                | Cross-sectional    | Cases; culling rates; animals accepted/rejected for onward sale; treatments and prophylaxis; condition of animals on departure                                    |
| Brennan (3)  | 2017 | USA       | Brucellosis                                                            | Agriculture and livestock | Various feeding grounds (1990-2014)                                                                                                                            | Supplemental feeding of wildlife                                | Wildlife distribution and density                | Local        | Agriculture; national parks and conservation | Case-control       | Brucellosis-affected livestock herds near fed elk (-) vs unfed elk (+)                                                                                            |
| Fournié (4)  | 2011 | Hong Kong | H5N1 (Avian influenza)                                                 | Retail                    | N/A                                                                                                                                                            | Rest days                                                       | Domesticated animal pathogen survival and spread | Local        | N/A                                          | Modelling          | Flock reproduction number $r$ , defined as the expected number of secondary cases (market or farm) per single infected case in a fully susceptible population (-) |
| Kung (5)     | 2003 | Hong Kong | H9N2 (Avian influenza);                                                | Retail                    | Jun-01                                                                                                                                                         | Rest days                                                       | Domesticated animal pathogen                     | Local        | Not stated                                   | Natural experiment | Prevalence of H9N2 in faecal samples from                                                                                                                         |

| First author | Year | Country   | Disease(s)              | Intervention sector             | Implementation date            | Policy type                                                                                                                                 | Spillover pathway                                                         | Policy level | Governance sector                            | Study design       | Key variables or concepts (Policy impact: direction of impact on outcome (+/-/=))                                                                                                                                                                                                                    |
|--------------|------|-----------|-------------------------|---------------------------------|--------------------------------|---------------------------------------------------------------------------------------------------------------------------------------------|---------------------------------------------------------------------------|--------------|----------------------------------------------|--------------------|------------------------------------------------------------------------------------------------------------------------------------------------------------------------------------------------------------------------------------------------------------------------------------------------------|
|              |      |           | Newcastle disease virus |                                 |                                |                                                                                                                                             | survival and spread                                                       |              |                                              |                    | LBMs, post vs. pre-rest days (-); prevalence of Newcastle disease virus in faecal samples from LBMs, post vs. pre-rest days (=)                                                                                                                                                                      |
| Kung (6)     | 2013 | Australia | Hendra                  | Agriculture and livestock       | Not stated                     | Recommendations for livestock owners (stable horses overnight; place water away from trees; isolate sick horses and seek veterinary advice) | Domesticated animal exposure; pathogen prevalence in domesticated animals | Local        | Not stated                                   | Cross-sectional    | Awareness of state information on Hendra virus and risks management strategies among horse owners; risk management practices among horse owners; perception of state advice among horse owners (e.g. advice is not in layman's terms, expensive to implement, focus should be on flying fox control) |
| Pinsent (7)  | 2017 | China     | Avian influenza         | Retail                          | N/A                            | Market size                                                                                                                                 | Domesticated animal distribution and density                              | Local        | N/A                                          | Modelling          | Prevalence of two strains of avian influenza (-)                                                                                                                                                                                                                                                     |
| Wu (8)       | 2019 | China     | H5N1 (Avian influenza)  | Conservation and national parks | Prior to data collection start | Habitat protection                                                                                                                          | Wildlife distribution and density                                         | Global       | Agriculture; national parks and conservation | Case-control       | Risk of outbreak of H5N1 (-)                                                                                                                                                                                                                                                                         |
| Yu (9)       | 2014 | China     | H7N9 (Avian influenza)  | Retail                          | Apr-13                         | Market closure                                                                                                                              | Human exposure                                                            | Local        | Health                                       | Natural experiment | Poultry-to-person transmission of H7N9 (-)                                                                                                                                                                                                                                                           |
| Walker (10)  | 2010 | Vietnam   | H5N1 (Avian influenza)  | Agriculture and livestock       | 2005                           | Mandatory livestock vaccination                                                                                                             | Within-domesticated animal barriers                                       | National     | Animal health                                | Natural experiment | Transmission between farms (-); time taken to identify outbreaks (+)                                                                                                                                                                                                                                 |

| First author  | Year | Country        | Disease(s)             | Intervention sector                                        | Implementation date | Policy type                                                            | Spillover pathway                                | Policy level | Governance sector                   | Study design                                       | Key variables or concepts (Policy impact: direction of impact on outcome (+/-/=))                                                                                   |
|---------------|------|----------------|------------------------|------------------------------------------------------------|---------------------|------------------------------------------------------------------------|--------------------------------------------------|--------------|-------------------------------------|----------------------------------------------------|---------------------------------------------------------------------------------------------------------------------------------------------------------------------|
| Basinski (11) | 2019 | USA            | Rabies                 | Conservation and national parks                            | N/A                 | Transmissible vaccination using oral bait                              | Pathogen prevalence in wildlife                  | National     | N/A                                 | Modelling                                          | Seroprevalence of rabies (+)                                                                                                                                        |
| Liu (12)      | 2015 | China          | H7N9 (Avian influenza) | Agriculture and livestock                                  | N/A                 | Screen and cull                                                        | Pathogen prevalence in domesticated animals      | National     | N/A                                 | Modelling                                          | New human H7N9 cases (-)                                                                                                                                            |
| Roy (13)      | 2011 | N/A            | Brucellosis            | Agriculture and livestock                                  | N/A                 | Mandatory livestock vaccination                                        | Within-domesticated animal barriers              | N/A          | N/A                                 | Modelling                                          | Basic reproductive ratio (-)                                                                                                                                        |
| Roy (13)      | 2011 | N/A            | Brucellosis            | Agriculture and livestock                                  | N/A                 | Screen and cull                                                        | Pathogen prevalence in domesticated animals      | N/A          | N/A                                 | Modelling                                          | Basic reproductive ratio (-)                                                                                                                                        |
| Häsler (14)   | 2012 | Switzerland    | Avian influenza        | Agriculture and livestock; conservation and national parks | Sep-05              | Multi-component strategy                                               | Multiple points                                  | National     | Animal health                       | Cost-effectiveness analysis                        | Probability of primary and secondary HPAIV outbreaks in poultry with active surveillance in place relative to the situation with no active surveillance             |
| Horigan (15)  | 2019 | United Kingdom | Avian influenza        | Agriculture and livestock                                  | 2005                | Disinfection of livestock premises                                     | Domesticated animal pathogen survival and spread | Regional     | Not stated                          | Qualitative risk assessment                        | Probability of virus survival on different types of equipment in a depopulated contaminated poultry house before and after preliminary and secondary C&D procedures |
| Hassim (16)   | 2017 | South Africa   | Anthrax                | Agriculture and livestock                                  | 2007-2008           | Carcass containment (burning, disinfecting or putting in plastic bags) | Wildlife pathogen survival and spread            | National     | Agriculture, fisheries and forestry | Repeat cross-sectional pre-post quasi-experimental | Anthrax present at carcass disposal sites (-)                                                                                                                       |

| First author  | Year | Country            | Disease(s)          | Intervention sector             | Implementation date | Policy type                                            | Spillover pathway                                | Policy level | Governance sector | Study design                                          | Key variables or concepts (Policy impact: direction of impact on outcome (+/-/=))                                                                                                          |
|---------------|------|--------------------|---------------------|---------------------------------|---------------------|--------------------------------------------------------|--------------------------------------------------|--------------|-------------------|-------------------------------------------------------|--------------------------------------------------------------------------------------------------------------------------------------------------------------------------------------------|
| Selhorst (17) | 1999 | N/A                | Rabies              | Conservation and national parks | N/A                 | Vaccination using oral bait                            | Pathogen prevalence in wildlife                  | N/A          | N/A               | Modelling                                             | Immunisation rate (+)                                                                                                                                                                      |
| Samaan (18)   | 2012 | Indonesia          | Avian influenza     | Retail                          | 2006                | Information campaign                                   | Domesticated animal pathogen survival and spread | Global       | Health            | Repeat cross-sectional pre-post non-experimental      | Knowledge and practices to limit spread of avian influenza among stallholders (+)                                                                                                          |
| De Lucca (19) | 2013 | Brazil             | Rabies              | Agriculture and livestock       | 2010                | Targeted vaccination of domestic animals               | Within-domesticated animal barriers              | National     | Animal health     | Cross-sectional post-test only quasi-experimental     | Probability of infectious contact between dogs and cats and rabies-positive bats in areas with targeted vaccination versus control areas (+)                                               |
| Hegazy (20)   | 2009 | Egypt              | Brucellosis         | Agriculture and livestock       | Not stated          | Screen and cull                                        | Pathogen prevalence in domesticated animals      | National     | Animal health     | Modelling                                             | Prevalence of brucellosis (-)                                                                                                                                                              |
| Busani (21)   | 2007 | Italy              | Avian influenza     | Agriculture and livestock       | 2000                | Livestock vaccination                                  | Within-domesticated animal barriers              | Local        | Animal health     | Repeat cross-sectional pre-post quasi-experimental    | Risk of infection (-)                                                                                                                                                                      |
| Kimani (22)   | 2016 | Kenya              | Rift Valley Fever   | Agriculture and livestock       | N/A                 | Livestock surveillance + improved vaccination coverage | Pathogen prevalence in domesticated animals      | National     | N/A               | Modelling                                             | DALYs averted (-); cost-effectiveness for public health system (+)                                                                                                                         |
| Cardador (23) | 2019 | Spain and Portugal | Avian influenza     | Trade                           | Oct, 2005           | Wildlife trade ban                                     | Human exposure                                   | Regional     | Not stated        | Longitudinal interrupted time series non-experimental | (1) change in introduction numbers: numbers of new nonnative bird species annually recorded; (-) after the EU ban. (2) bird availability for sale in local pet markets; (=) after the ban. |
| Bonwitt (24)  | 2018 | Sierra Leone       | Ebola virus disease | Production and trade            | Not stated          | Wild meat ban (hunting, sale, and consumption)         | Human exposure                                   | National     | Health            | Qualitative semi-                                     | Lived experiences and accounts of participant's                                                                                                                                            |

| First author   | Year | Country   | Disease(s)                    | Intervention sector       | Implementation date | Policy type                                           | Spillover pathway                                | Policy level | Governance sector                          | Study design                                     | Key variables or concepts (Policy impact: direction of impact on outcome (+/-/=))                                                                                                                                                                                                         |
|----------------|------|-----------|-------------------------------|---------------------------|---------------------|-------------------------------------------------------|--------------------------------------------------|--------------|--------------------------------------------|--------------------------------------------------|-------------------------------------------------------------------------------------------------------------------------------------------------------------------------------------------------------------------------------------------------------------------------------------------|
|                |      |           |                               |                           |                     |                                                       |                                                  |              |                                            | structured interviews                            | understanding and interpretation of public health messages related to EVD and wild animals, and how these understandings affected hunting, consumption, and trade of wild meat.                                                                                                           |
| Yuan (25)      | 2015 | China     | Avian Influenza A(H7N9) Virus | Retail                    | 2014                | Market closure and Disinfection of livestock premises | Domesticated animal pathogen survival and spread | Local        | Health                                     | Repeat cross-sectional pre-post non-experimental | Detection rates for H7N9 and AIV during market closure (-) and after market re-opening (=)                                                                                                                                                                                                |
| Naletoski (26) | 2010 | Macedonia | Brucellosis                   | Agriculture and livestock | Mid 1970s           | Screen and cull                                       | Pathogen prevalence in domesticated animals      | National     | Animal health; Agriculture and environment | Descriptive cross-sectional study                | Expected and actual number of sampled (tested) sheep and goats; absolute number of positive animals; number of infected vs non-infected holdings; prevalence of brucellosis; disease prevalence in the investigated villages; and removal rate of positive animals between 2000 and 2006. |
| Vivancos (27)  | 2008 | UK        | Avian influenza               | Public health             | 2007                | Vaccination of poultry workers                        | Within-human barriers                            | National     | Health                                     | Rapid cross-sectional evaluation                 | Delivery, uptake and costs of seasonal influenza vaccine among poultry workers; problems                                                                                                                                                                                                  |

| First author    | Year | Country | Disease(s)                                                      | Intervention sector       | Implementation date | Policy type                                                                                                      | Spillover pathway                                                | Policy level | Governance sector           | Study design         | Key variables or concepts (Policy impact: direction of impact on outcome (+/-/=))                                                                                                                                                            |
|-----------------|------|---------|-----------------------------------------------------------------|---------------------------|---------------------|------------------------------------------------------------------------------------------------------------------|------------------------------------------------------------------|--------------|-----------------------------|----------------------|----------------------------------------------------------------------------------------------------------------------------------------------------------------------------------------------------------------------------------------------|
|                 |      |         |                                                                 |                           |                     |                                                                                                                  |                                                                  |              |                             |                      | encountered; ways of improving delivery                                                                                                                                                                                                      |
| Brinkley (28)   | 2018 | USA     | Avian influenza                                                 | Agriculture and livestock | 1905-2016           | Backyard poultry ordinances (e.g. vaccination, veterinary care, number of animals allowed)                       | Multiple points                                                  | Local        | Animal health; Agriculture  | Comparative analysis | Poultry ordinances passed in Colorado; guidelines for the health and welfare of backyard poultry; shelter and welfare agency intake                                                                                                          |
| Smith (29)      | 2001 | England | Rabies and Bovine Tuberculosis                                  | Conservation and health   | N/A                 | Culling; sterilisation; vaccination                                                                              | Wildlife density & distribution; pathogen prevalence in wildlife | N/A          | N/A                         | Modelling            | Disease eradication (+)                                                                                                                                                                                                                      |
| Weaver (30)     | 2016 | USA     | Avian influenza                                                 | Agriculture and livestock | N/A                 | Screen and remove                                                                                                | Pathogen prevalence in domesticated animals                      | National     | N/A                         | Modelling            | Likelihood of detecting HPAI virus where present (+)                                                                                                                                                                                         |
| Lauterbach (31) | 2020 | USA     | Influenza A virus and antimicrobial resistant coliform bacteria | Agriculture and livestock | Not stated          | Recommendations for agricultural fairs (Hand sanitation stations, signage on risk, signage on washing procedure) | Human exposure                                                   | Local        | Animal health; human health | Cross-sectional      | Antimicrobial resistant coliform bacteria (+); influenza A virus was detection (-); utilization of educational signage (=); presence of hand sanitation stations at fairs (+) ; proportion of fairgoers who use hand sanitation stations (-) |
| Tustin (32)     | 2011 | Iceland | Campylobacteriosis                                              | Agriculture and livestock | 1995 to 2007        | Multi-component strategy (Biosecurity measures and producer education,                                           | Domesticated animal pathogen survival and spread;                | National     | Animal health; food safety  |                      | On-farm surveillance of Campylobacter; producer and consumer education;                                                                                                                                                                      |

| First author | Year | Country            | Disease(s)             | Intervention sector       | Implementation date                 | Policy type                                                                                        | Spillover pathway                                                                                               | Policy level | Governance sector | Study design    | Key variables or concepts (Policy impact: direction of impact on outcome (+/-/=))                                                                                                                        |
|--------------|------|--------------------|------------------------|---------------------------|-------------------------------------|----------------------------------------------------------------------------------------------------|-----------------------------------------------------------------------------------------------------------------|--------------|-------------------|-----------------|----------------------------------------------------------------------------------------------------------------------------------------------------------------------------------------------------------|
|              |      |                    |                        |                           |                                     | campylobacter surveillance in poultry, interventions in poultry processing)                        | human exposure                                                                                                  |              |                   |                 | enhanced biosecurity measures; changes in poultry processing; leak-proof packaging policy; freezing policy for products from Campylobacter-positive poultry flocks; multidisciplinary response committee |
| Lewis (33)   | 2015 | Canada             | Avian influenza (HPAI) | Agriculture and livestock | N/A                                 | Multi-component strategy (Screen and cull; movement restrictions; biosecurity measures)            | Multiple points (Pathogen prevalence in domesticated animals; domesticated animal pathogen survival and spread) | Local        | N/A               | Modelling       | Number of infected flocks (--)                                                                                                                                                                           |
| Lewis (33)   | 2015 | Canada             | Avian influenza (HPAI) | Agriculture and livestock | N/A                                 | Multi-component strategy (Screen and cull; ring cull; movement restrictions; biosecurity measures) | Multiple points (Pathogen prevalence in domesticated animals; domesticated animal pathogen survival and spread) | Local        | N/A               | Modelling       | Number of infected flocks (-)                                                                                                                                                                            |
| Swayne (34)  | 2011 | Multiple Countries | Avian influenza        | Agriculture and livestock | Various dates between 2002 and 2010 | Livestock vaccination, including as part of a multi-component strategy                             | Within-domesticated animal barriers                                                                             | National     | Not stated        | Cross-sectional | Avian influenza (AI) control strategies; general AI vaccine use policy; AI vaccine bank; vaccine usage;                                                                                                  |

| First author  | Year | Country                              | Disease(s)      | Intervention sector       | Implementation date | Policy type                                                                               | Spillover pathway | Policy level | Governance sector            | Study design                                            | Key variables or concepts (Policy impact: direction of impact on outcome (+/-/=))                                                                                                                                                                                                       |
|---------------|------|--------------------------------------|-----------------|---------------------------|---------------------|-------------------------------------------------------------------------------------------|-------------------|--------------|------------------------------|---------------------------------------------------------|-----------------------------------------------------------------------------------------------------------------------------------------------------------------------------------------------------------------------------------------------------------------------------------------|
|               |      |                                      |                 |                           |                     |                                                                                           |                   |              |                              |                                                         | vaccination strategy; vaccine licensing; national poultry and egg production; national poultry density; HPAI and LPNAI outbreaks and the species affected; AI vaccine coverage (%)                                                                                                      |
| Turkson (35)  | 2016 | Ghana                                | Avian influenza | Agriculture and livestock | 2007                | Multiple strategies (biosecurity; reporting; culling with compensation; movement control) | Multiple points   | National     | Animal health                | Cross-sectional (closed and open-ended questions)       | Practices, capacity and incentives in terms of implementing peacetime preventive mitigation measures (biosecurity and reporting) among poultry supply chain actors and outbreak containment measures (culling with compensation and movement control) among poultry supply chain actors |
| Guerrier (36) | 2012 | Wallis and Futuna (French Polynesia) | Brucellosis     | Agriculture and livestock | 2004 and 2008       | Information campaign                                                                      | Human exposure    | Local        | Animal health; public health | Cross-sectional; qualitative semi-structured interviews | Level of knowledge of brucellosis; local hygiene standards and veterinary access; local understanding of pig-associated illness; adequacy and cultural appropriateness                                                                                                                  |



| First author   | Year | Country | Disease(s)             | Intervention sector       | Implementation date            | Policy type                                                                                    | Spillover pathway                           | Policy level | Governance sector | Study design                                                             | Key variables or concepts (Policy impact: direction of impact on outcome (+/-/=))                                                                                                                                                                                                                                                                                                                                                                              |
|----------------|------|---------|------------------------|---------------------------|--------------------------------|------------------------------------------------------------------------------------------------|---------------------------------------------|--------------|-------------------|--------------------------------------------------------------------------|----------------------------------------------------------------------------------------------------------------------------------------------------------------------------------------------------------------------------------------------------------------------------------------------------------------------------------------------------------------------------------------------------------------------------------------------------------------|
|                |      |         |                        |                           |                                |                                                                                                |                                             |              |                   |                                                                          | of public health measures                                                                                                                                                                                                                                                                                                                                                                                                                                      |
| Anderson (37)  | 2012 | Mexico  | Rabies                 | Agriculture and livestock | 1997 and 2006                  | Livestock vaccination                                                                          | Within-domesticated animal barriers         | National     | N/A               | Modelling                                                                | Benefit-cost ratio (+)                                                                                                                                                                                                                                                                                                                                                                                                                                         |
| Anderson (37)  | 2012 | Mexico  | Rabies                 | Conservation              | 1997 and 2006                  | Wildlife cull                                                                                  | Wildlife distribution and density           | National     | N/A               | Modelling                                                                | Benefit-cost ratio (-)                                                                                                                                                                                                                                                                                                                                                                                                                                         |
| Akunzule (38)  | 2019 | Ghana   | Avian Influenza (HPAI) | Agriculture and livestock | 2006-2007                      | Multiple strategies (destruction of infected eggs; culling; decontamination; movement control) | Multiple points                             | National     | Animal health     | Cross-sectional; qualitative semi-structured interviews and focus groups | Direct costs associated with HPAI prevention and control measures; loss in expected output due to the presence of HPAI; losses due to fall in domestic prices and demand; cost of HPAI prevention measures (such as cost of vaccine to control the disease, cost of disinfectant, foot bath, and other related costs to improve biosecurity); Benefits - the summation of the avoided losses of the expected output and the decrease in the cost of prevention |
| Andronico (39) | 2019 | France  | Avian influenza (HPAI) | Agriculture and livestock | 2016-2017                      | Screen and cull                                                                                | Pathogen prevalence in domesticated animals | National     | N/A               | Modelling                                                                | Number of infected premises (-); number of animals culled (-)                                                                                                                                                                                                                                                                                                                                                                                                  |
| Wu (40)        | 2014 | China   | Influenza A(H7N9)      | Retail                    | Various local closures in 2014 | Market closure                                                                                 | Human exposure                              | National     | Not stated        | Natural experiment (non-                                                 | Human risk for H7N9 infection (-)                                                                                                                                                                                                                                                                                                                                                                                                                              |

| First author | Year | Country     | Disease(s)               | Intervention sector       | Implementation date                      | Policy type                         | Spillover pathway                           | Policy level | Governance sector                      | Study design                                                              | Key variables or concepts (Policy impact: direction of impact on outcome (+/-/=))                                           |
|--------------|------|-------------|--------------------------|---------------------------|------------------------------------------|-------------------------------------|---------------------------------------------|--------------|----------------------------------------|---------------------------------------------------------------------------|-----------------------------------------------------------------------------------------------------------------------------|
|              |      |             |                          |                           |                                          |                                     |                                             |              |                                        | experimental repeat cross-sectional; number of time points not specified) |                                                                                                                             |
| Kang (41)    | 2015 | China       | Avian Influenza A (H7N9) | Retail                    | March 2013 – June 2014                   | Market closure                      | Human exposure                              | Local        | Health                                 | Repeat cross-sectional pre-post non-experimental                          | Proportion of H7N9-positive environmental samples                                                                           |
| Beyer (42)   | 2010 | Tanzania    | Rabies                   | Public Health             | Multiple vaccination campaigns 2000-2006 | Vaccination in domesticated animals | Within-domesticated animal barriers         | Not stated   | Public Health; Livestock and fisheries | Modelling                                                                 | Rabies occurrence as indicated by patients reported with bites from suspected rabid dogs (-)                                |
| Chowell (43) | 2013 | China       | Influenza A (H7N9)       | Retail                    | Apr-13                                   | Market closure                      | Human exposure                              | Not stated   | Public Health                          | Repeat cross-sectional interrupted time series non-experimental           | Reproduction number (R) of A/H7N9 (-)                                                                                       |
| Backer (44)  | 2015 | Netherlands | Avian influenza (HPAI)   | Agriculture and livestock | N/A                                      | Multi-component strategy            | Multiple points                             | Regional     | N/A                                    | Modelling                                                                 | Relative to pre-emptive cull and emergency vaccination: Epidemic duration (+); number of culled farms (=)                   |
| Backer (44)  | 2015 | Netherlands | Avian influenza (HPAI)   | Agriculture and livestock | N/A                                      | Pre-emptive cull                    | Pathogen prevalence in domesticated animals | Regional     | N/A                                    | Modelling                                                                 | Relative to multi-component strategy and emergency vaccination: Epidemic duration (-); number of culled farms (+)           |
| Backer (44)  | 2015 | Netherlands | Avian influenza (HPAI)   | Agriculture and livestock | N/A                                      | Emergency vaccination               | Within-domesticated animal barriers         | Regional     | N/A                                    | Modelling                                                                 | Relative to multi-component strategy and pre-emptive cull: number of culled farms (-); Epidemic duration relative to multi- |

| First author       | Year | Country     | Disease(s)           | Intervention sector       | Implementation date | Policy type              | Spillover pathway                           | Policy level | Governance sector | Study design                                            | Key variables or concepts (Policy impact: direction of impact on outcome (+/-/=))                                                                                                                                                                                          |
|--------------------|------|-------------|----------------------|---------------------------|---------------------|--------------------------|---------------------------------------------|--------------|-------------------|---------------------------------------------------------|----------------------------------------------------------------------------------------------------------------------------------------------------------------------------------------------------------------------------------------------------------------------------|
|                    |      |             |                      |                           |                     |                          |                                             |              |                   |                                                         | component strategy (-) and pre-emptive cull (+)                                                                                                                                                                                                                            |
| Brooks-Moizer (45) | 2009 | Vietnam     | Avian Influenza H5N1 | Trade                     | 2005                | Trade ban                | Human exposure                              | National     | Animal Health     | Cross-sectional; qualitative semi-structured interviews | Volume of wild bird trade; number of species on sale; vendor awareness and understanding of legislation                                                                                                                                                                    |
| Backer (46)        | 2008 | Netherlands | Swine fever          | Agriculture and livestock | N/A                 | Multi-component strategy | Multiple points                             | Regional     | N/A               | Modelling                                               | Relative to pre-emptive culling and vaccination: Epidemic duration (+); pre-emptively culled farms (-)                                                                                                                                                                     |
| Backer (46)        | 2008 | Netherlands | Swine fever          | Agriculture and livestock | N/A                 | Pre-emptive cull         | Pathogen prevalence in domesticated animals | Regional     | N/A               | Modelling                                               | Relative to multi-component strategy and livestock vaccination: Epidemic duration (-, except for 5km ring vaccination); number of culled farms (+)                                                                                                                         |
| Backer (46)        | 2008 | Netherlands | Swine fever          | Agriculture and livestock | N/A                 | Livestock vaccination    | Within-domesticated animal barriers         | Regional     | N/A               | Modelling                                               | Relative to multi-component strategy and pre-emptive cull: Epidemic duration (= for smaller vaccination radius (lower than multi-component and higher than culling); - for larger vaccination radius); number of culled farms relative to multi-component strategy (+) and |

| First author      | Year | Country        | Disease(s)             | Intervention sector               | Implementation date  | Policy type                          | Spillover pathway                   | Policy level | Governance sector | Study design          | Key variables or concepts (Policy impact: direction of impact on outcome (+/-/=))                                                                                  |
|-------------------|------|----------------|------------------------|-----------------------------------|----------------------|--------------------------------------|-------------------------------------|--------------|-------------------|-----------------------|--------------------------------------------------------------------------------------------------------------------------------------------------------------------|
|                   |      |                |                        |                                   |                      |                                      |                                     |              |                   |                       | pre-emptive culling (-)                                                                                                                                            |
| El Masry (47)     | 2013 | Egypt          | Influenza A H5N1       | Agriculture and livestock         | N/A                  | Livestock vaccination                | Within-domesticated animal barriers | National     | N/A               | Modelling             | Cumulative annual flock immunity (=)                                                                                                                               |
| Knight-Jones (48) | 2011 | United Kingdom | Avian influenza (HPAI) | Agriculture and livestock         | 2006                 | Separation of wildlife and livestock | Domesticated animal exposure        | National     | Animal Health     | Cross-sectional       | Implementation of recommendations (separation of wild and domestic birds) by poultry farmers; cost and welfare issues relating to implementing the recommendations |
| Xing (49)         | 2017 | China          | H7N9 Avian Influenza   | Retail                            | N/A                  | Market closure                       | Human exposure                      | N/A          | N/A               | Modelling             | Theoretic number of human cases: no market closure (+); markets closed (short term) (- then +); markets closed (no reopening (-))                                  |
| Lin (50)          | 2017 | China          | H7N9                   | Agriculture and livestock; retail | Late 2014            | Central slaughtering                 | Human exposure                      | Local        | Not stated        | Cross-sectional       | Demographics; knowledge and perception of avian flu; perception of the CSLPP; influential on attitudes towards the CSLPP                                           |
| De Serres (51)    | 2009 | Canada         | Rabies                 | Public Health                     | 1998, update in 2006 | Post-exposure prophylaxis            | Within-human barriers               | National     | Public Health     | Risk-benefit analysis | Proportion of population exposed annually; Proportion of RPEP-eligible person reached; Incidence of preventable disease; NNT per case prevented; human and         |

| First author | Year | Country       | Disease(s)        | Intervention sector             | Implementation date | Policy type                                                                                                                                                                                          | Spillover pathway                                | Policy level | Governance sector           | Study design                            | Key variables or concepts (Policy impact: direction of impact on outcome (+/-/=))                                                                                                                                                                                |
|--------------|------|---------------|-------------------|---------------------------------|---------------------|------------------------------------------------------------------------------------------------------------------------------------------------------------------------------------------------------|--------------------------------------------------|--------------|-----------------------------|-----------------------------------------|------------------------------------------------------------------------------------------------------------------------------------------------------------------------------------------------------------------------------------------------------------------|
|              |      |               |                   |                                 |                     |                                                                                                                                                                                                      |                                                  |              |                             |                                         | material resources required per case prevented                                                                                                                                                                                                                   |
| Shwiff (52)  | 2009 | United States | Rabies            | Conservation and National Parks | N/A                 | Wildlife vaccination                                                                                                                                                                                 | Pathogen prevalence in wildlife                  | Local        | N/A                         | Cost-benefit analysis                   | Costs: area of bait application; bait price; bait density; campaign frequency; mode of bait application; level of prevention; contingency expenditure. Benefits (cost savings): direct - copayment of PEP; indirect - costs of human exposure and animal testing |
| Massey (52)  | 2011 | Australia     | Swine brucellosis | Hunting                         | 2010                | Recommendations for hygiene practices (recommended risk reduction strategies for feral pig hunters harvesting wild boar meat to prevent swine brucellosis, e.g. cover cuts, wear gloves, wash hands) | Human exposure                                   | Local        | Public Health (Food safety) | Qualitative interviews and focus groups | Appropriateness of current swine brucellosis risk reduction strategies; potential alternative strategies; appropriateness of information dissemination; potential dissemination ideas                                                                            |
| Huang (53)   | 2017 | China         | HPAI              | Livestock and agriculture       | Not stated          | Safe disposal of infected livestock                                                                                                                                                                  | Domesticated animal pathogen survival and spread | National     | Animal health               | Cross-sectional                         | Acceptable compensation levels; location; gender; age; education; farm size; net income; % net income from farm; contact with                                                                                                                                    |

| First author | Year | Country   | Disease(s)             | Intervention sector       | Implementation date | Policy type              | Spillover pathway | Policy level | Governance sector | Study design                                     | Key variables or concepts (Policy impact: direction of impact on outcome (+/-/=))                                                                                                                                                                                                                                                |
|--------------|------|-----------|------------------------|---------------------------|---------------------|--------------------------|-------------------|--------------|-------------------|--------------------------------------------------|----------------------------------------------------------------------------------------------------------------------------------------------------------------------------------------------------------------------------------------------------------------------------------------------------------------------------------|
|              |      |           |                        |                           |                     |                          |                   |              |                   |                                                  | epidemic prevention staff                                                                                                                                                                                                                                                                                                        |
| Hunter (54)  | 2014 | Indonesia | HPAI                   | Agriculture and livestock | 2010                | Multi-component strategy | Multiple points   | National     | Not stated        | Cross-sectional survey; focus groups; interviews | Demographic data; poultry flock management; management of sick/dead birds; HPAI knowledge and perceptions; HPAI occurrences; HPAI activities (information sources and information flow)                                                                                                                                          |
| Teng (55)    | 2018 | China     | Avian influenza (H7N9) | Retail                    | 2013                | Market closures          | Human exposure    | Local        | Public Health     | Modelling                                        | Number of confirmed cases after live poultry market closures (-); number of human cases in latent population after market closures (-)                                                                                                                                                                                           |
| Karki (56)   | 2015 | Nepal     | Avian influenza H5N1   | Animal Health             | 2007                | Multi-component strategy | Multiple points   | National     | Not stated        | Cost-benefit analysis                            | Cost under control program (surveillance; stamping out operations and compensation; trainging, communication and information) losses under current control program (losses due to morality cause by HPAI H5N1; losses due to culling of poultry; losses due to production ban period; losses due to market reaction); absence of |

| First author | Year | Country | Disease(s)    | Intervention sector       | Implementation date | Policy type              | Spillover pathway | Policy level | Governance sector | Study design          | Key variables or concepts (Policy impact: direction of impact on outcome (+/-/=))                                                                                                                                                                                                                                                                                                       |
|--------------|------|---------|---------------|---------------------------|---------------------|--------------------------|-------------------|--------------|-------------------|-----------------------|-----------------------------------------------------------------------------------------------------------------------------------------------------------------------------------------------------------------------------------------------------------------------------------------------------------------------------------------------------------------------------------------|
|              |      |         |               |                           |                     |                          |                   |              |                   |                       | control measures (losses due to HPAI mortality; losses due to market reaction); vaccine programme costs (cost of vaccine; cost of administering vaccine; cost of surveillance; cost of stamping-out operations and compensation; cost of training, communication and information dissemination); losses under vaccination program (losses due to HPAI mortality; losses due to culling) |
| Kangas (57)  | 2007 | Finland | Salmonellosis | Agriculture and livestock | 1995                | Multi-component strategy | Multiple points   | National     | Not stated        | Cost-benefit analysis | Control costs; public health losses (Official salmonella control costs; additional control of primary and secondary production; market disturbances; feed control; additional )not FSCP) control costs to society; public health losses; losses due to premature death)                                                                                                                 |

| First author  | Year | Country       | Disease(s)              | Intervention sector                             | Implementation date        | Policy type                                                                                                                                                                                                                                                           | Spillover pathway                                | Policy level | Governance sector            | Study design                                                    | Key variables or concepts (Policy impact: direction of impact on outcome (+/-/=))                                                                                                                |
|---------------|------|---------------|-------------------------|-------------------------------------------------|----------------------------|-----------------------------------------------------------------------------------------------------------------------------------------------------------------------------------------------------------------------------------------------------------------------|--------------------------------------------------|--------------|------------------------------|-----------------------------------------------------------------|--------------------------------------------------------------------------------------------------------------------------------------------------------------------------------------------------|
| Zhu (58)      | 2020 | China         | Avian influenza (H7N9)  | Retail                                          | N/A                        | Market closures                                                                                                                                                                                                                                                       | Human exposure                                   | Local        | N/A                          | Modelling                                                       | Weekly number of human cases (-); cumulative number of human cases (-)                                                                                                                           |
| Zhu (58)      | 2020 | China         | Avian influenza (H7N9)  | Retail                                          | N/A                        | Multi-component market management policy (disinfection, cleaning, monthly rest day, zero poultry overnight)                                                                                                                                                           | Domesticated animal pathogen survival and spread | Local        | N/A                          | Modelling                                                       | Weekly number of human cases (-); cumulative number of human cases (-)                                                                                                                           |
| Stewart (59)  | 2017 | United States | Influenza A (H3N2v)     | Livestock and agriculture                       | 2013, update November 2016 | Recommendations for agricultural fairs (Hand sanitation stations, signage on risk, signage on washing procedure)                                                                                                                                                      | Human exposure                                   | National     | Animal health; public health | Cross-sectional                                                 | Demographic data (gender; age; number of household members attended fairs (with or without outbreak), uptake of season influenza vaccine); behaviours (practices); attitudes; support; knowledge |
| Oladokun (60) | 2012 | Nigeria       | HPAI influenza A (H5N1) | Trade; Agriculture and livestock; Animal health | 2006                       | Multi-component strategy (Total ban on import of poultry and poultry products, national borders were monitored, surveillance of live bird markets and control posts were intensified, proper disinfection of equipment in laboratory settings, disposal of carcasses) | Multiple points                                  | National     | Agriculture; Animal Health   | Repeat cross-sectional interrupted time series non-experimental | Human cases of HPAI (-)                                                                                                                                                                          |



| First author       | Year | Country       | Disease(s)                        | Intervention sector               | Implementation date      | Policy type                                                                                                                            | Spillover pathway                   | Policy level | Governance sector                   | Study design                                             | Key variables or concepts (Policy impact: direction of impact on outcome (+/-/=))                                                 |
|--------------------|------|---------------|-----------------------------------|-----------------------------------|--------------------------|----------------------------------------------------------------------------------------------------------------------------------------|-------------------------------------|--------------|-------------------------------------|----------------------------------------------------------|-----------------------------------------------------------------------------------------------------------------------------------|
| Karabozhilova (61) | 2012 | UK            | Avian disease                     | Agriculture and livestock         | 2001                     | Ban on feeding catering waste to livestock                                                                                             | Domesticated animal exposure        | National     | Agriculture                         | Cross-sectional                                          | Compliance with the ban on feeding catering waste                                                                                 |
| Manyweathers (62)  | 2017 | Australia     | Hendra virus                      | Livestock and Agriculture         | Not stated               | Recommended livestock vaccination                                                                                                      | Within-domesticated animal barriers | Local        | Agriculture                         | Cross-sectional survey (closed and open-ended questions) | Attitudes to the vaccine; assesment of risk; attitudes to authorities; factors that influence the potential uptake of vaccination |
| Sanchez (63)       | 2020 | United States | Rabies and Canine distemper virus | Conservation                      | 2001 (rabies) 2000 (CDV) | Vaccination and surveillance                                                                                                           | Pathogen prevalence in wildlife     | Local        | Conservation                        | Modelling                                                | Number of sentinels monitored and monitoring frequency (+), earlier epidemic detection, infected foxes on day of detection (-)    |
| Yee (64)           | 2008 | United States | Avian influenza                   | Retail; Livestock and Agriculture | 2005                     | LBM biosecurity measures (Direct delivery of birds to farms, carcass disposal through rendering services, control program)             | Multiple points                     | Local        | Food and Agriculture, Animal Health | Cross-sectional                                          | Compliance with biosecurity measures                                                                                              |
| Huot (65)          | 2008 | Canada        | Rabies                            | Public Health                     | 2002                     | Human vaccination (post-exposure prophylaxis)                                                                                          | Within-human barriers               | National     | Public Health                       | Cross-sectional                                          | Type of exposure; bat virological analysis; cost of investigation, virological analysis and RPEP                                  |
| Manyweathers (66)  | 2017 | Australia     | Hendra virus                      | Livestock and Agriculture         | 2015                     | Multi-component strategy (Covering horses' food and water containers, keeping horses off pasture when flying foxes are active, keeping | Domesticated animal exposure        | Local        | Livestock and Agriculture           | Cross-sectional                                          | Uptake of recommended risk mitigation strategies, factors influencing uptake; coping factors; affective factors; attitude         |

| First author | Year | Country       | Disease(s)           | Intervention sector       | Implementation date               | Policy type                                                                                                                                                      | Spillover pathway                       | Policy level | Governance sector                           | Study design                                                    | Key variables or concepts (Policy impact: direction of impact on outcome (+/-/=))                                                                                                                                                                                                                                                                                                    |
|--------------|------|---------------|----------------------|---------------------------|-----------------------------------|------------------------------------------------------------------------------------------------------------------------------------------------------------------|-----------------------------------------|--------------|---------------------------------------------|-----------------------------------------------------------------|--------------------------------------------------------------------------------------------------------------------------------------------------------------------------------------------------------------------------------------------------------------------------------------------------------------------------------------------------------------------------------------|
|              |      |               |                      |                           |                                   | horses away from flowering trees.)                                                                                                                               |                                         |              |                                             |                                                                 | to hendra virus risk                                                                                                                                                                                                                                                                                                                                                                 |
| Wang (67)    | 2020 | China         | H7N9 Avian Influenza | Retail                    | Multiple local closures 2013-2018 | Live poultry market closure                                                                                                                                      | Human exposure                          | Local        | Not stated                                  | Repeat cross-sectional interrupted time series non-experimental | Daily incidence rates (-)                                                                                                                                                                                                                                                                                                                                                            |
| Mroz (68)    | 2017 | Egypt         | Rift Valley Fever    | Livestock and Agriculture | 1980                              | Livestock vaccination                                                                                                                                            | Within-domesticated animal barriers     | National     |                                             | Serological cross-sectional study                               | RFVF anti-body prevalence                                                                                                                                                                                                                                                                                                                                                            |
| Davis (69)   | 2019 | United States | Rabies               | Conservation and Wildlife | 1995                              | Wildlife vaccination (oral rabies vaccination)                                                                                                                   | Pathogen prevalence in wildlife         | National     | Agriculture; wildlife; animal health        | Longitudinal interrupted time series non-experimental           | Rabies occupancy (-), duration of baiting and bait density influence seroprevalence in raccoons                                                                                                                                                                                                                                                                                      |
| Kwan (70)    | 2016 | Japan         | Rabies               | Trade                     | Nov-04                            | Multi-component strategy (identification with microchip, two-time rabies vaccination, antibody level titration and 180-day waiting period in country of origin.) | Pathogen prevalence in domestic animals | National     | Foreign affairs; Agriculture; Public Health | Modelling                                                       | Risk of rabies introduction (-); risk of rabies introduction as a result of one Russian fishing boat arriving at the port of Hokkaido (-); theoretical number of Russian boat arrivals required to result in one rabies case (-); Annual probability that at least one rabies case is introduced (-); number of years required to elapse for the introduction of one rabies case (+) |

| First author     | Year | Country       | Disease(s)               | Intervention sector       | Implementation date                                           | Policy type                                                                            | Spillover pathway                                | Policy level | Governance sector                    | Study design                                                    | Key variables or concepts (Policy impact: direction of impact on outcome (+/-/=))                             |
|------------------|------|---------------|--------------------------|---------------------------|---------------------------------------------------------------|----------------------------------------------------------------------------------------|--------------------------------------------------|--------------|--------------------------------------|-----------------------------------------------------------------|---------------------------------------------------------------------------------------------------------------|
| Garcia-Diaz (71) | 2016 | Australia     | Ranaviruses              | Trade                     | Not stated                                                    | Border and post-border biosurveillance and biosecurity                                 | Pathogen prevalence in wildlife                  | National     | Not stated                           | Modelling                                                       | Absolute risk of introduction of alien ranavirus (-); absolute risk of infected alien amphibian stowaways (-) |
| Graiver (72)     | 2009 | United States | Avian Influenza (H6N2)   | Livestock and Agriculture | 2006                                                          | Disposal regulations for infected carcasses                                            | Domesticated animal pathogen survival and spread | National     | Environment                          | Cross-sectional                                                 | Avian influenza virus survival                                                                                |
| Chen (73)        | 2020 | China         | Avian Influenza A (H7N9) | Retail                    | Multiple closures 2013-2017                                   | Live poultry market closure                                                            | Human exposure                                   | Local        | Public health                        | Repeat cross-sectional interrupted time series non-experimental | Relative risk of H7N9 infection (-)                                                                           |
| Fournié (74)     | 2013 | Vietnam       | HPAIV H5N1               | Trade                     | N/A                                                           | Disinfection                                                                           | Domesticated animal pathogen survival and spread | N/A          | N/A                                  | Modelling (Social network analysis)                             | Median epidemic size (-)                                                                                      |
| Ma (75)          | 2019 | China         | Avian Influenza A (H7N9) | Retail                    | Multiple closures 2013-2017                                   | Live poultry market closures                                                           | Human exposure                                   | Local        |                                      | Case-control                                                    | Incidence of H7N9 cases (-)                                                                                   |
| Thomas (76)      | 2013 | Grenada       | Rabies                   | Animal health             | Not stated                                                    | Domestic animal vaccination                                                            | Within-domesticated animal barriers              | National     | Agriculture; Public Health           | Cross-sectional                                                 | Behavioural beliefs, control beliefs, normative beliefs, risk perception                                      |
| Gordon (77)      | 2005 | United States | Rabies                   | Conservation              | 1997 in Ohio, 2001 extended to Pennsylvania and West Virginia | Wildlife vaccination (oral rabies vaccination)                                         | Pathogen prevalence in wildlife                  | Local        | Agriculture; wildlife; public health | Modelling                                                       | Costs; cost savings; estimate of advance (km/year)                                                            |
| Mendez (78)      | 2014 | Australia     | Hendra virus (HeV)       | Veterinary Health         | 2010                                                          | Multi-component strategy (HeV exposure management by veterinarians (e.g., use of PPE)) | Human exposure                                   | Local        | Animal health                        | Cross-sectional                                                 | Professional, veterinary practice, and HeV management experience; HeV management strategies; PPE usage        |

| First author | Year | Country       | Disease(s)                        | Intervention sector       | Implementation date | Policy type                                                                                                                                                                                                                                                                 | Spillover pathway                                                                    | Policy level | Governance sector      | Study design                            | Key variables or concepts (Policy impact: direction of impact on outcome (+/-/=))                                                                                                |
|--------------|------|---------------|-----------------------------------|---------------------------|---------------------|-----------------------------------------------------------------------------------------------------------------------------------------------------------------------------------------------------------------------------------------------------------------------------|--------------------------------------------------------------------------------------|--------------|------------------------|-----------------------------------------|----------------------------------------------------------------------------------------------------------------------------------------------------------------------------------|
| Okello (79)  | 2018 | Lao PDR       | T. solium taeniasis-cysticercosis | Public health             | Not stated          | Mass drug administration in humans                                                                                                                                                                                                                                          | Within-human barriers                                                                | National     | Health and Agriculture | Modelling                               | Cost per DALY averted relative to treating pigs and humans (-)                                                                                                                   |
| Okello (79)  | 2018 | Lao PDR       | T. solium taeniasis-cysticercosis | Public health             | Not stated          | Mass drug administration in humans and livestock                                                                                                                                                                                                                            | Multiple points (within-human barriers, pathogen prevalence in domesticated animals) | National     | Health and Agriculture | Modelling                               | Cost per DALY averted relative to treating humans only (+)                                                                                                                       |
| Lu (80)      | 2009 | Saudi Arabia  | H5N1 HPAI                         | Livestock and Agriculture | 2007                | Multi-component strategy (Live bird market closures, surveillance tests on poultry species, "stamping out", quarantine restrictions, training for veterinarians on biosecurity measures and sample collection, hygienic disposal of poultry carcasses and infectious waste) | Multiple points (Pathogen prevalence in domesticated animals; human exposure)        | National     | Not stated             | Ecological study using multiple methods | Number of affected farms; location of outbreaks; implementation of control measures                                                                                              |
| Rasouli (81) | 2009 | Azerbaijan    | Brucellosis                       | Livestock and Agriculture | Not stated          | Livestock vaccination                                                                                                                                                                                                                                                       | Within-domesticated animal barriers                                                  | Local        | Not stated             | Modelling                               | Net profit (+), costs (-), cost-benefit ratio (+)                                                                                                                                |
| Wilson (82)  | 2001 | United States | Rabies                            | Animal Health             | 1979, amended 1988  | Vaccination in domesticated animals                                                                                                                                                                                                                                         | Within-domesticated animal barriers                                                  | Local        | Public health          | Retrospective surveillance              | Number of animals receiving PEP; PEP failure rate; characteristics of PEP failure cases (age, date of exposure, date of vaccination/PEP administration, date of rabies incident) |

| First author  | Year | Country | Disease(s)           | Intervention sector           | Implementation date                                                                           | Policy type                                                        | Spillover pathway                           | Policy level | Governance sector                         | Study design                                                  | Key variables or concepts (Policy impact: direction of impact on outcome (+/-/=))                                                                                       |
|---------------|------|---------|----------------------|-------------------------------|-----------------------------------------------------------------------------------------------|--------------------------------------------------------------------|---------------------------------------------|--------------|-------------------------------------------|---------------------------------------------------------------|-------------------------------------------------------------------------------------------------------------------------------------------------------------------------|
| Wang (83)     | 2018 | China   | H7N9 Avian Influenza | Retail                        | 3 closure periods: 10-23 Feb 2014; 19-28 Feb 2015; 8-21 Jan 2017                              | Market closure                                                     | Human exposure                              | Local        | Public Health                             | Natural experiment                                            | Relative risk of H7N9 infection                                                                                                                                         |
| Lyu (84)      | 2014 | China   | H7N9 Avian Influenza | Retail                        | Multiple staggered 3-month market closures from Jan 2014 onwards                              | Market closure and disinfection of livestock premises              | Human exposure                              | Local        | Public Health                             | Natural experiment                                            | Number of human cases of H7N9 infection                                                                                                                                 |
| Cuthbert (85) | 2011 | India   | Multiple             | Livestock and agriculture     | 2006 (withdrawal of permits to manufacture); 2008 (use of diclofenac an imprisonable offence) | Ban on veterinary drugs dangerous to wildlife                      | Wildlife distribution and density           | National     | Conservation; public health (drug policy) | Modelling                                                     | Prevalence of diclofenac in domestic ungulate carcasses (-); concentration of diclofenac in domestic ungulate carcasses (-); rate of decline of vulture populations (-) |
| Weaver (86)   | 2016 | Japan   | Rabies               | Animal Health                 | 1950; amended 1998                                                                            | Mandatory dog registration and vaccination                         | Pathogen prevalence in domestic animals     | National     | Animal health; border control             | Cross sectional; qualitative interviews and document analysis | Cases of rabies; implementation; roles and responsibilities                                                                                                             |
| Weaver (86)   | 2016 | Japan   | BSE                  | Animal Health; border control | Ongoing review (2001; 2009)                                                                   | Screen and cull                                                    | Pathogen prevalence in domesticated animals | National     | Animal Health                             | Qualitative interviews and document analysis                  | Policy learning                                                                                                                                                         |
| Weaver (86)   | 2016 | Japan   | Multiple             | Border control                | Not stated                                                                                    | Quarantine and border security for livestock and animal food items | Pathogen prevalence in domesticated animals | National     | Animal Health; Food safety                | Document analysis                                             | Resourcing; organisational structure and collaboration; implementation                                                                                                  |
| Weaver (86)   | 2016 | Japan   | Multiple             | Animal Health                 | Not stated                                                                                    | Annual biosecurity inspections of livestock premises               | Pathogen prevalence in domesticated animals | National     | Animal health                             | Document analysis                                             | Funding adequacy; implementation                                                                                                                                        |

| First author                             | Year | Country      | Disease(s)  | Intervention sector          | Implementation date                 | Policy type                                                                                                 | Spillover pathway                                          | Policy level | Governance sector                  | Study design                     | Key variables or concepts (Policy impact: direction of impact on outcome (+/-/=))                                                                                                               |
|------------------------------------------|------|--------------|-------------|------------------------------|-------------------------------------|-------------------------------------------------------------------------------------------------------------|------------------------------------------------------------|--------------|------------------------------------|----------------------------------|-------------------------------------------------------------------------------------------------------------------------------------------------------------------------------------------------|
| Weaver (86)                              | 2016 | Japan        | HPAI        | Border control               | Not stated                          | Import ban on livestock from areas with HPAI                                                                | Pathogen prevalence in domesticated animals                | National     | Animal health                      | Document analysis                | Resourcing; organisational structure and collaboration; implementation                                                                                                                          |
| Amparo (87)                              | 2018 | Philippines  | Rabies      | Public health                | 2016                                | Post-exposure prophylaxis                                                                                   | Within-human barriers                                      | National     | Public Health                      | Repeat cross-sectional survey    | Animal bite/scratch incidence; health-seeking behaviour; Out of pocket PEP expenses                                                                                                             |
| Ferguson (88)                            | 2015 | Philippines  | Rabies      | Animal Health                | 2010-2012 (3 vaccination campaigns) | Domestic animal vaccination                                                                                 | Within-domesticated animal barriers                        | Global       | Public Health                      | Modelling                        | Vaccination coverage (+); rabies elimination (-)                                                                                                                                                |
| Shwiff (89)                              | 2016 | South Africa | Rabies      | Animal Health; public health | 2007                                | Domestic animal vaccination; post-exposure prophylaxis                                                      | Within-domesticated animal barriers; within-human barriers | Global       | Public Health                      | Modelling                        | Cost per dog vaccinated; cost of PEP; cost per human life saved                                                                                                                                 |
| Bechir (90)                              | 2005 | Chad         | Multiple    | Veterinary Health            | 2000                                | Domestic animal vaccination; vaccination for human populations with occupational exposure (nomadic herders) | Within-domesticated animal barriers; within-human barriers | National     | Public Health; Agriculture         | Process                          | Vaccination coverage in livestock and human populations; resource savings compared to conducting veterinary and public health vaccination campaigns separately; cost per child fully vaccinated |
| Roth (91)                                | 2003 | Mongolia     | Brucellosis | Livestock and agriculture    | N/A                                 | Livestock vaccination                                                                                       | Within-domesticated animal barriers                        | National     | N/A                                | Modelling                        | Cost-effectiveness relative to existing coverage (+)                                                                                                                                            |
| United Against Rabies Collaboration (92) | 2019 | Global       | Rabies      | Public Health; Animal Health | 2015                                | Domestic animal vaccination; integrated bite case management                                                | Within-domesticated animal barriers;                       | Global       | Public Health; Animal Health; Food | Cross-sectional; document review | Country adoption and implementation; PEP                                                                                                                                                        |

| First author  | Year | Country      | Disease(s)                                            | Intervention sector       | Implementation date                | Policy type                                         | Spillover pathway                           | Policy level | Governance sector                   | Study design                                 | Key variables or concepts (Policy impact: direction of impact on outcome (+/-/=))                                                                                                                      |
|---------------|------|--------------|-------------------------------------------------------|---------------------------|------------------------------------|-----------------------------------------------------|---------------------------------------------|--------------|-------------------------------------|----------------------------------------------|--------------------------------------------------------------------------------------------------------------------------------------------------------------------------------------------------------|
|               |      |              |                                                       |                           |                                    |                                                     | human exposure; within-human barriers       |              | and Agriculture                     |                                              | administration; bite reporting; cost; numbers of individuals receiving information about rabies                                                                                                        |
| Berry (93)    | 2018 | Global       | Multiple                                              | Global Public Health      | N/A                                | Establishment of a global pandemic fund             | Multiple points                             | Global       | N/A                                 | Modelling                                    | Human health expenditures (-); lost productivity and commerce (-); self-insurance and protection capital (e.g., hospitals, surveillance networks, lab facilities and equipment) (+); outbreak risk (-) |
| Campbell (94) | 2022 | Australia    | Multiple (Salmonella, E. Coli, T. gondii)             | Livestock and hunting     | 1996; 1997; 2007; 2008; 2010; 2020 | Standards for hygienic production of wild game meat | Pathogen prevalence in domesticated animals | National     | Agriculture, fisheries and forestry | Qualitative interviews and document analysis | Private and public stakeholders involved; relevant legislation and standards; audit processes; policy learning and improvement                                                                         |
| Campbell (94) | 2022 | South Africa | Avian influenza                                       | Livestock and agriculture | 1984; 2006; 2012                   | Test and quarantine                                 | Pathogen prevalence in domesticated animals | National     | Agriculture                         | Qualitative interviews and document analysis | Private and public stakeholders involved; relevant legislation and standards; audit processes; policy learning and improvement                                                                         |
| Campbell (94) | 2022 | France       | Multiple (including Q Fever, Salmonella, Brucellosis) | Animal Health; Hunting    | Not stated                         | Veterinary inspection of wild-caught carcasses      | Human exposure                              | National     | Animal Health; hunting              | Qualitative interviews and document analysis | Private and public stakeholders involved; relevant legislation and standards; audit processes; policy learning and improvement                                                                         |

| First author                                                                                | Year | Country | Disease(s)                                                         | Intervention sector          | Implementation date | Policy type               | Spillover pathway | Policy level | Governance sector                 | Study design | Key variables or concepts (Policy impact: direction of impact on outcome (+/-/=))     |
|---------------------------------------------------------------------------------------------|------|---------|--------------------------------------------------------------------|------------------------------|---------------------|---------------------------|-------------------|--------------|-----------------------------------|--------------|---------------------------------------------------------------------------------------|
| Ministry of Agriculture, Livestock, Fisheries and Cooperatives; and Ministry of Health (95) | 2021 | Kenya   | Multiple (including rabies, brucellosis, tuberculosis, salmonella) | Animal Health; Public Health | 2012                | One Health strategic plan | Multiple points   | National     | Agriculture and livestock; Health | Not stated   | Agenda-setting; preparedness and response capacity; guideline development; challenges |



## References for included evaluations

1. Li Y, Wang Y, Shen C, Huang J, Kang J, Huang B, et al. Closure of live bird markets leads to the spread of H7N9 influenza in China. *PLoS One* [Internet]. 2018 Dec 12 [cited 2021 Apr 6];13(12). Available from: <https://www.ncbi.nlm.nih.gov/pmc/articles/PMC6291110/>
2. Abbas B, Yousif MA, Nur HM. Animal health constraints to livestock exports from the Horn of Africa: -EN- -FR- Restrictions sanitaires imposées aux exportations de bétail à partir de la corne de l’Afrique -ES- Limitaciones zoonositarias a las exportaciones de ganado desde el Cuerno de África. *Rev Sci Tech OIE*. 2014 Dec 1;33(3):711–21.
3. Brennan A, Cross PC, Portacci K, Scurlock BM, Edwards WH. Shifting brucellosis risk in livestock coincides with spreading seroprevalence in elk. *PLOS ONE*. 2017 Jun 13;12(6):e0178780.
4. Fournié G, Guitian FJ, Mangtani P, Ghani AC. Impact of the implementation of rest days in live bird markets on the dynamics of H5N1 highly pathogenic avian influenza. *Journal of The Royal Society Interface*. 2011 Aug 7;8(61):1079–89.
5. Kung NY, Guan Y, Perkins NR, Bissett L, Ellis T, Sims L, et al. The Impact of a Monthly Rest Day on Avian Influenza Virus Isolation Rates in Retail Live Poultry Markets in Hong Kong. *Avian Diseases*. 2003 Sep;47(s3):1037–41.
6. Kung N, McLaughlin A, Taylor M, Moloney B, Wright T, Field H. Hendra Virus and Horse Owners – Risk Perception and Management. *PLOS ONE*. 2013 Nov 15;8(11):e80897.
7. Pinsent A, Pepin KM, Zhu H, Guan Y, White MT, Riley S. The persistence of multiple strains of avian influenza in live bird markets. *Proceedings of the Royal Society B: Biological Sciences*. 2017 Dec 6;284(1868):20170715.
8. Wu T, Perrings C, Shang C, Collins JP, Daszak P, Kinzig A, et al. Protection of wetlands as a strategy for reducing the spread of avian influenza from migratory waterfowl. *Ambio*. 2020 Apr 1;49(4):939–49.
9. Yu H, Wu JT, Cowling BJ, Liao Q, Fang VJ, Zhou S, et al. Effect of closure of live poultry markets on poultry-to-person transmission of avian influenza A H7N9 virus: an ecological study. *The Lancet*. 2014 Feb 8;383(9916):541–8.
10. Walker PGT, Cauchemez S, Metras R, Dung DH, Pfeiffer D, Ghani AC. A Bayesian Approach to Quantifying the Effects of Mass Poultry Vaccination upon the Spatial and Temporal Dynamics of H5N1 in Northern Vietnam. *PLoS Comput Biol*. 2010 Feb;6(2):e1000683.
11. Basinski AJ, Nuismer SL, Remien CH. A little goes a long way: Weak vaccine transmission facilitates oral vaccination campaigns against zoonotic pathogens. *PLOS Neglected Tropical Diseases*. 2019 Mar 8;13(3):e0007251.

12. Liu Z, Fang CT. A modeling study of human infections with avian influenza A H7N9 virus in mainland China. *Int J Infect Dis*. 2015 Dec;41:73–8.
13. Roy S, McElwain TF, Wan Y. A Network Control Theory Approach to Modeling and Optimal Control of Zoonoses: Case Study of Brucellosis Transmission in Sub-Saharan Africa. Gürtler RE, editor. *PLoS Negl Trop Dis*. 2011 Oct 11;5(10):e1259.
14. Häsler B, Howe KS, Hauser R, Stärk KDC. A qualitative approach to measure the effectiveness of active avian influenza virus surveillance with respect to its cost: A case study from Switzerland. *Preventive Veterinary Medicine*. 2012;105(3):209–22.
15. Horigan V, Gale P, Adkin A, Brown I, Clark J, Kelly L. A qualitative risk assessment of cleansing and disinfection requirements after an avian influenza outbreak in commercial poultry. *British Poultry Science*. 2019 Nov 2;60(6):691–9.
16. Hassim A, Dekker EH, Byaruhanga C, Reardon T, Van Heerden H. A retrospective study of anthrax on the Ghaap Plateau, Northern Cape province of South Africa, with special reference to the 2007–2008 outbreaks. *Onderstepoort j vet res [Internet]*. 2017 Sep 28 [cited 2021 Jul 22];84(1). Available from: <https://ojvr.org/index.php/ojvr/article/view/1414>
17. Selhorst T, Müller T. An evaluation of the efficiency of rabies control strategies in fox (*Vulpes vulpes*) populations using a computer simulation program. *Ecological Modelling*. 1999;124(2–3):221–32.
18. Samaan G, Hendrawati F, Taylor T, Pitona T, Marmansari D, Rahman R, et al. Application of a healthy food markets guide to two Indonesian markets to reduce transmission of “avian flu”. *Bull World Health Organ*. 2012 Apr 1;90(4):295–300.
19. De Lucca T, Alves Rodrigues RC, Castagna C, Presotto D, De Nadai DV, Fagre A, et al. Assessing the rabies control and surveillance systems in Brazil: An experience of measures toward bats after the halt of massive vaccination of dogs and cats in Campinas, Sao Paulo. *Prev Vet Med*. 2013 Aug 1;111(1–2):126–33.
20. Hegazy YM, Ridler AL, Guitian FJ. Assessment and simulation of the implementation of brucellosis control programme in an endemic area of the Middle East. *Epidemiol Infect*. 2009 Oct;137(10):1436–48.
21. Busani L, Pozza MD, Bonfanti L, Toson M, Marangon S. Evaluation of the Efficacy of Intervention Measures and Vaccination for the Control of LPAI Epidemics in Verona Province (Veneto, Italy). *Avian Diseases*. 2007 Mar;51(s1):463–6.
22. Kimani T, Schelling E, Bett B, Ngigi M, Randolph T, Fuhrmann S. Public Health Benefits from Livestock Rift Valley Fever Control: A Simulation of Two Epidemics in Kenya. *EcoHealth*. 2016 Dec;13(4):729–42.

23. Cardador L, Tella JL, Anadon JD, Abellan P, Carrete M. The European trade ban on wild birds reduced invasion risks. *Conserv Lett*. 2019 May;12(3):e12631.
24. Bonwitt J, Dawson M, Kandeh M, Ansumana R, Sahr F, Brown H, et al. Unintended consequences of the 'bushmeat ban' in West Africa during the 2013–2016 Ebola virus disease epidemic. *Social Science & Medicine*. 2018 Mar;200:166–73.
25. Yuan J, Lau EHY, Li K, Leung YHC, Yang Z, Xie C, et al. Effect of Live Poultry Market Closure on Avian Influenza A(H7N9) Virus Activity in Guangzhou, China, 2014. *Emerg Infect Dis*. 2015 Oct;21(10):1784–93.
26. Naletoski I, Kirandziski T, Mitrov D, Krstevski K, Dzadzovski I, Acevski S. Gaps in Brucellosis Eradication Campaign in Sheep and Goats in Republic of Macedonia: Lessons Learned. *Croat Med J*. 2010 Aug;51(4):351–6.
27. Vivancos R, Showell D, Keeble B, Goh S, Kroese M, Lipp A, et al. Vaccination of Poultry Workers: Delivery and Uptake of Seasonal Influenza Immunization. *Zoonoses Public Health*. 2011 Mar;58(2):126–30.
28. Brinkley C, Kingsley JS, Mench J. A Method for Guarding Animal Welfare and Public Health: Tracking the Rise of Backyard Poultry Ordinances. *J Community Health*. 2018 Aug;43(4):639–46.
29. Smith GC, Cheeseman CL. A mathematical model for the control of diseases in wildlife populations: culling, vaccination and fertility control. *Ecological Modelling*. 2002 Apr;150(1–2):45–53.
30. Todd Weaver J, Malladi S, Bonney PJ, Patyk KA, Bergeron JG, Middleton JL, et al. A Simulation-Based Evaluation of Premovement Active Surveillance Protocol Options for the Managed Movement of Turkeys to Slaughter During an Outbreak of Highly Pathogenic Avian Influenza in the United States. *Avian Diseases*. 2016 May;60(1s):132–45.
31. Lauterbach SE, Nelson SW, Martin AM, Spurck MM, Mathys DA, Mollenkopf DF, et al. Adoption of recommended hand hygiene practices to limit zoonotic disease transmission at agricultural fairs. *Preventive Veterinary Medicine* [Internet]. 2020;182. Available from: <https://www.scopus.com/inward/record.uri?eid=2-s2.0-85088938136&doi=10.1016%2Fj.prevetmed.2020.105116&partnerID=40&md5=2a4ce113994ec8fcb5c2ffc81f55c728>
32. Tustin J, Laberge K, Michel P, Reiersen J, Dadadottir S, Briem H, et al. A National Epidemic of Campylobacteriosis in Iceland, Lessons Learned. *Zoonoses Public Health*. 2011 Sep;58(6):440–7.
33. Lewis N, Dorjee S, Dube C, VanLeeuwen J, Sanchez J. Assessment of Effectiveness of Control Strategies Against Simulated Outbreaks of Highly Pathogenic Avian Influenza in Ontario, Canada. *Transbound Emerg Dis*. 2017 Jun;64(3):938–50.

34. Swayne DE, Pavade G, Hamilton K, Vallat B, Miyagishima K. Assessment of national strategies for control of high-pathogenicity avian influenza and low-pathogenicity notifiable avian influenza in poultry, with emphasis on vaccines and vaccination. *Rev Sci Tech Off Int Epizoot.* 2011 Dec;30(3):839–70.
35. Turkson PK, Okike I. Assessment of practices, capacities and incentives of poultry chain actors in implementation of highly pathogenic avian influenza mitigation measures in Ghana. *Vet Med Sci.* 2016 Feb;2(1):23–35.
36. Guerrier G, Foster H, Metge O, Chouvin C, Tui M. Cultural contexts of swine-related infections in Polynesia. *Clinical Microbiology and Infection.* 2013 Jul;19(7):595–9.
37. Anderson A, Shwiff S, Gebhardt K, Ramírez AJ, Shwiff S, Kohler D, et al. Economic Evaluation of Vampire Bat (*Desmodus rotundus*) Rabies Prevention in Mexico. *Transbound Emerg Dis.* 2014 Apr;61(2):140–6.
38. Akunzule AN, Koney EBM, Tiongco M. Economic impact assessment of highly pathogenic avian influenza on the poultry industry in Ghana. *Worlds Poult Sci J.* 2009 Sep;65(3):517–27.
39. Andronico A, Courcoul A, Bronner A, Scoizec A, Lebouquin-Leneveu S, Guinat C, et al. Highly pathogenic avian influenza H5N8 in south-west France 2016–2017: A modeling study of control strategies. *Epidemics.* 2019 Sep;28:100340.
40. Wu P, Jiang H, Wu JT, Chen E, He J, Zhou H, et al. Poultry Market Closures and Human Infection with Influenza A(H7N9) Virus, China, 2013–14. *Emerg Infect Dis.* 2014 Nov;20(11):1891–4.
41. Kang M, He J, Song T, Rutherford S, Wu J, Lin J, et al. Environmental Sampling for Avian Influenza A(H7N9) in Live-Poultry Markets in Guangdong, China. Davis T, editor. *PLoS ONE.* 2015 May 1;10(5):e0126335.
42. Beyer HL, Hampson K, Lembo T, Cleaveland S, Kaare M, Haydon DT. Metapopulation dynamics of rabies and the efficacy of vaccination. *Proc R Soc B-Biol Sci.* 2011 Jul 22;278(1715):2182–90.
43. Chowell G, Simonsen L, Towers S, Miller MA, Viboud C. Transmission potential of influenza A/H7N9, February to May 2013, China. *BMC Med.* 2013 Oct 2;11:214.
44. Backer JA, van Roermund HJW, Fischer EAJ, van Asseldonk MAPM, Bergevoet RHM. Controlling highly pathogenic avian influenza outbreaks: An epidemiological and economic model analysis. *Prev Vet Med.* 2015 Sep 1;121(1–2):142–50.
45. Brooks-Moizer F, Robertson SI, Edmunds K, Bell D. Avian Influenza H5N1 and the Wild Bird Trade in Hanoi, Vietnam. *Ecol Soc.* 2009 Jun;14(1):28.

46. Backer JA, Hagenaars TJ, van Roermund HJW, de Jong MCM. Modelling the effectiveness and risks of vaccination strategies to control classical swine fever epidemics. *J R Soc Interface*. 2009 Oct 6;6(39):849–61.
47. El Masry I, Rijks J, Peyre M, Taylor N, Lubroth J, Jobre Y. Modelling influenza A H5N1 vaccination strategy scenarios in the household poultry sector in Egypt. *Trop Anim Health Prod*. 2014 Jan;46(1):57–63.
48. Knight-Jones TJD, Gibbens J, Wooldridge M, Staerk KDC. Assessment of Farm-Level Biosecurity Measures after an Outbreak of Avian Influenza in the United Kingdom. *Transbound Emerg Dis*. 2011 Feb;58(1):69–75.
49. Xing Y, Song L, Sun GQ, Jin Z, Zhang J. Assessing reappearance factors of H7N9 avian influenza in China. *Appl Math Comput*. 2017 Sep 15;309:192–204.
50. Lin X, Zhang D, Wang X, Huang Y, Du Z, Zou Y, et al. Attitudes of consumers and live-poultry workers to central slaughtering in controlling H7N9: a cross-sectional study. *BMC Public Health*. 2017 May 26;17:517.
51. De Serres G, Skowronski DM, Mimault P, Ouakki M, Maranda-Aubut R, Duval B. Bats in the Bedroom, Bats in the Belfry: Reanalysis of the Rationale for Rabies Postexposure Prophylaxis. *Clin Infect Dis*. 2009 Jun 1;48(11):1493–9.
52. Shwiff SA, Sterner RT, Hale R, Jay MT, Sun B, Slate D. Benefit Cost Scenarios of Potential Oral Rabies Vaccination for Skunks in California. *Journal of Wildlife Diseases*. 2009 Jan;45(1):227–33.
53. Huang Z, Wang J, Zuo A. Chinese farmers' willingness to accept compensation to practice safe disposal of HPAI infected chicken. *Prev Vet Med*. 2017 Apr 1;139:67–75.
54. Hunter C, Birden HH, Toribio JA, Booy R, Abdurrahman M, Ambarawati AIGAA, et al. Community preparedness for highly pathogenic Avian influenza on Bali and Lombok, Indonesia. *Rural Remote Health*. 2014 Sep;14(3):2772.
55. Teng Y, Bi D, Guo X, Hu D, Feng D, Tong Y. Contact reductions from live poultry market closures limit the epidemic of human infections with H7N9 influenza. *J Infect*. 2018 Mar;76(3):295–304.
56. Karki S, Lupiani B, Budke CM, Karki NPS, Rushton J, Ivanek R. Cost-benefit analysis of avian influenza control in Nepal. *OIE Revue Scientifique et Technique*. 2015;34(3):813–27.
57. Kangas S, Lyytikäinen T, Peltola J, Ranta J, Maijala R. Costs of two alternative Salmonella control policies in Finnish broiler production. *Acta Veterinaria Scandinavica* [Internet]. 2007;49(1). Available from: <https://www.scopus.com/inward/record.uri?eid=2-s2.0-38949119786&doi=10.1186%2f1751-0147-49-35&partnerID=40&md5=1a5a5cb9be107d9c92f10af6743ed9b7>

58. Zhu G, Kang M, Wei X, Tang T, Liu T, Xiao J, et al. Different intervention strategies toward live poultry markets against avian influenza A (H7N9) virus: Model-based assessment. *Environmental Research* [Internet]. 2020; Available from: <https://www.scopus.com/inward/record.uri?eid=2-s2.0-85096862816&doi=10.1016%2fj.envres.2020.110465&partnerID=40&md5=477f42ba6d643042adfe7a99bb2e3414>
59. Stewart RJ, Rossow J, Conover JT, Lobelo EE, Eckel S, Signs K, et al. Do animal exhibitors support and follow recommendations to prevent transmission of variant influenza at agricultural fairs? A survey of animal exhibitor households after a variant influenza virus outbreak in Michigan. *Zoonoses Public Health*. 2018 Feb;65(1):195–201.
60. Oladokun AT, Meseko CA, Ighodalo E, John B, Ekong PS. Effect of intervention on the control of Highly Pathogenic Avian Influenza in Nigeria. :8.
61. Karabozhilova I, Wieland B, Alonso S, Salonen L, Häslér B. Backyard chicken keeping in the Greater London Urban Area: welfare status, biosecurity and disease control issues. *British Poultry Science*. 2012 Aug;53(4):421–30.
62. Manyweathers J, Field H, Longnecker N, Agho K, Smith C, Taylor M. ‘Why won’t they just vaccinate?’ Horse owner risk perception and uptake of the Hendra virus vaccine. *BMC Vet Res*. 2017 Apr 13;13:103.
63. Sanchez JN, Hudgens BR. Vaccination and monitoring strategies for epidemic prevention and detection in the Channel Island fox (*Urocyon littoralis*). Seirin-Lee S, editor. *PLoS ONE*. 2020 May 18;15(5):e0232705.
64. Yee KS, Carpenter TE, Mize S, Cardona CJ. The Live Bird Market System and Low-Pathogenic Avian Influenza Prevention in Southern California. :5.
65. Huot C, De Serres G, Duval B, Maranda-Aubut R, Ouakki M, Skowronski DM. The cost of preventing rabies at any cost: Post-exposure prophylaxis for occult bat contact. *Vaccine*. 2008;26(35):4446–50.
66. Manyweathers J, Field H, Jordan D, Longnecker N, Agho K, Smith C, et al. Risk Mitigation of Emerging Zoonoses: Hendra Virus and Non-Vaccinating Horse Owners. *Transbound Emerg Dis*. 2017 Dec;64(6):1898–911.
67. Wang W, Artois J, Wang X, Kucharski AJ, Pei Y, Tong X, et al. Effectiveness of live poultry market interventions on human infection with avian influenza A(H7N9) virus, China. *Emerging Infectious Diseases*. 2020;26(5):891–901.
68. Mroz C, Gwida M, El-Ashker M, Ziegler U, Homeier-Bachmann T, Eiden M, et al. Rift Valley fever virus infections in Egyptian cattle and their prevention. *Transbound Emerg Dis*. 2017 Dec;64(6):2049–58.

69. Davis AJ, Nelson KM, Kirby JD, Wallace R, Ma X, Pepin KM, et al. Rabies surveillance identifies potential risk corridors and enables management evaluation. *Viruses* [Internet]. 2019;11(11). Available from: <https://www.scopus.com/inward/record.uri?eid=2-s2.0-85074547341&doi=10.3390%2fv11111006&partnerID=40&md5=7e257e5e1e407b60ed2127b3b5d92e50>
70. Kwan NCL, Ogawa H, Yamada A, Sugiura K. Quantitative risk assessment of the introduction of rabies into Japan through the illegal landing of dogs from Russian fishing boats in the ports of Hokkaido, Japan. *Prev Vet Med*. 2016 Jun 1;128:112–23.
71. García-Díaz P, Ross JV, Woolnough AP, Cassey P. Managing the risk of wildlife disease introduction: pathway-level biosecurity for preventing the introduction of alien ranaviruses. Bellard C, editor. *J Appl Ecol*. 2017 Feb;54(1):234–41.
72. Graiver DA, Topliff CL, Kelling CL, Bartelt-Hunt SL. Survival of the avian influenza virus (H6N2) after land disposal. *Environmental Science and Technology*. 2009;43(11):4063–7.
73. Chen Y, Cheng J, Xu Z, Hu W, Lu J. Live poultry market closure and avian influenza A (H7N9) infection in cities of China, 2013-2017: An ecological study. *BMC Infectious Diseases* [Internet]. 2020;20(1). Available from: <https://www.scopus.com/inward/record.uri?eid=2-s2.0-85085389244&doi=10.1186%2fs12879-020-05091-7&partnerID=40&md5=3d0b44da21fd54ab040ad844efe19a93>
74. Fournie G, Guitian J, Desvaux S, Cuong VC, Dung DH, Pfeiffer DU, et al. Interventions for avian influenza A (H5N1) risk management in live bird market networks. *Proceedings of the National Academy of Sciences of the United States of America*. 2013;110(22):9177–82.
75. Ma J, Yang N, Gu H, Bai L, Sun J, Gu S, et al. Effect of closure of live poultry markets in China on prevention and control of human infection with H7N9 avian influenza: a case study of four cities in Jiangsu Province. *Journal of Public Health Policy*. 2019;40(4):436–47.
76. Thomas D, Delgado A, Louison B, Lefrancois T, Shaw J. Examining dog owners' beliefs regarding rabies vaccination during government-funded vaccine clinics in Grenada to improve vaccine coverage rates. *Preventive Veterinary Medicine*. 2013;110(3–4):563–9.
77. Gordon ER, Krebs JW, Rupprecht CR, Real LA, Childs JE. Persistence of elevated rabies prevention costs following post-epizootic declines in rates of rabies among raccoons (*Procyon lotor*). *Preventive Veterinary Medicine*. 2005;68(2–4):195–222.
78. Mendez D, Buttner P, Speare R. Hendra virus in Queensland, Australia, during the winter of 2011: Veterinarians on the path to better management strategies. *Prev Vet Med*. 2014 Nov 1;117(1):40–51.
79. Okello AL, Thomas LF. Human taeniasis: current insights into prevention and management strategies in endemic countries. *RISK MANAG HEALTHC POLICY*. 2017;10:107–16.

80. Lu H, Ismail MM, Khan OA, Al Hammad Y, Rhman SSA, Al-Blowi MH. Epidemic Outbreaks, Diagnostics, and Control Measures of the H5N1 Highly Pathogenic Avian Influenza in the Kingdom of Saudi Arabia, 2007-08. *Avian Dis.* 2010 Mar;54(1):350–6.
81. Rasouli J, Holakoui K, Forouzanfar MH, Salari S, Bahoner, Rashidian A. Cost effectiveness of livestock vaccination for brucellosis in West-Azerbaijan province. *Urmia Medical Journal.* 2009;20(1):Pe13-En77.
82. Wilson PJ, Clark KA. Postexposure rabies prophylaxis protocol for domestic animals and epidemiologic characteristics of rabies vaccination failures in Texas: 1995-1999. *Journal of the American Veterinary Medical Association.* 2001 Feb;218(4):522–5.
83. Wang Man, Mao YunXia, Luo Le, Chen XueQin, Li Lei. Effects of short-term closing live poultry markets in controlling the H7N9 avian influenza pollution. *Chinese Journal of Zoonoses.* 2018;34(1):79–84.
84. Lyu HuaKun, Gong ZhenYu, Sun JiMin, Kong LingJie, Chen ZhiPing. Epidemic characteristics of human infection with avian influenza A (H7N9) virus and influence of closure of live poultry markets on the epidemic in Zhejiang. *Disease Surveillance.* 2014;29(9):700–3.
85. Cuthbert R, Taggart MA, Prakash V, Saini M, Swarup D, Upreti S, et al. Effectiveness of Action in India to Reduce Exposure of Gyps Vultures to the Toxic Veterinary Drug Diclofenac. Willis SG, editor. *PLoS ONE.* 2011 May 11;6(5):e19069.
86. John Weaver, Julie Punderson, John Stratton. OIE PVS Evaluation report of the Veterinary Services of Japan [Internet]. World Organization for Animal Health; 2016 [cited 2022 Sep 21]. Available from: [https://www.woah.org/fileadmin/Home/eng/Support\\_to\\_OIE\\_Members/docs/pdf/201807\\_27\\_Final\\_OIE\\_JAPAN\\_PVS\\_REPORT.pdf](https://www.woah.org/fileadmin/Home/eng/Support_to_OIE_Members/docs/pdf/201807_27_Final_OIE_JAPAN_PVS_REPORT.pdf)
87. Amparo ACB, Jayme SI, Roces MCR, Quizon MCL, Mercado MLL, Dela Cruz MPZ, et al. The evaluation of Animal Bite Treatment Centers in the Philippines from a patient perspective. Rupprecht CE, editor. *PLoS ONE.* 2018 Jul 26;13(7):e0200873.
88. Ferguson EA, Hampson K, Cleaveland S, Consunji R, Deray R, Friar J, et al. Heterogeneity in the spread and control of infectious disease: consequences for the elimination of canine rabies. *Sci Rep.* 2015 Dec;5(1):18232.
89. Shwiff SA, Hatch B, Anderson A, Nel LH, Leroux K, Stewart D, et al. Towards Canine Rabies Elimination in KwaZulu–Natal, South Africa: Assessment of Health Economic Data. *Transboundary and Emerging Diseases.* 2016;63(4):408–15.
90. Bechir M, Schelling E, Wyss K, Daugla DM, Daoud S, Tanner M, et al. APPROCHE NOVATRICE DES VACCINATIONS EN SANTÉ PUBLIQUE ET EN MÉDECINE VÉTÉRINAIRE CHEZ LES PASTEURS NOMADES AU TCHAD: EXPÉRIENCES ET COÛTS [An innovative approach



combining human and animal vaccination campaigns in nomadic settings of Chad: experiences and costs]. *Médecine Tropicale*. 2005;64(5):6.

91. Roth F, Zinsstag J, Orkhon D, Chimed-Ochir G, Hutton G, Cosivi O, et al. Human health benefits from livestock vaccination for brucellosis: case study. *Bulletin of the World Health Organization*. 2003;17.
92. World Health Organization, Food and Agriculture Organization of the United Nations, World Organisation for Animal Health. Zero by 30: the global strategic plan to end human deaths from dog-mediated rabies by 2030 [Internet]. Geneva: World Health Organization; 2018 [cited 2022 Sep 21]. 47 p. Available from: <https://apps.who.int/iris/handle/10665/272756>
93. Berry K, Allen T, Horan RD, Shogren JF, Finnoff D, Daszak P. The Economic Case for a Pandemic Fund. *EcoHealth*. 2018 Jun;15(2):244–58.
94. Sam Campbell, Anastasiya Timoshyna, Glenn Sant, Duan Biggs, Alexander Braczkowski, Hernan Caceres-Escobar, et al. REVIEW: OPTIONS FOR MANAGING AND TRACING WILD ANIMAL TRADE CHAINS TO REDUCE ZOO NOTIC DISEASE RISK [Internet]. Cambridge, UK: TRAFFIC UK; 2022 [cited 2022 Sep 23]. Available from: [https://www.traffic.org/site/assets/files/18246/traps\\_2\\_supply\\_chain\\_management\\_traceability\\_review\\_report\\_2-1.pdf](https://www.traffic.org/site/assets/files/18246/traps_2_supply_chain_management_traceability_review_report_2-1.pdf)
95. Ministry of Agriculture, Livestock, Fisheries and Cooperatives, Ministry of Health. Zoonotic Disease Unit: One Health Strategic Plan for the Prevention and Control of Zoonotic Diseases in Kenya (2021-2025) [Internet]. Nairobi; 2021 [cited 2022 Sep 27]. Available from: [https://www.onehealthcommission.org/documents/filelibrary/resources/one\\_health\\_strategic\\_action\\_plans/OneHealthStrategicPlan\\_Kenya\\_202120\\_8756689A2C54E.pdf](https://www.onehealthcommission.org/documents/filelibrary/resources/one_health_strategic_action_plans/OneHealthStrategicPlan_Kenya_202120_8756689A2C54E.pdf)
