# Supplementary material for: Policies to prevent zoonotic spillover: a systematic scoping review of evaluative evidence
Source: PubMed Central journal article supplement (PMC10634115; doi:10.1186/s12992-023-00986-x), 2023-11-08
Supplement: 12992_2023_986_MOESM4_ESM.pdf [file 12992_2023_986_MOESM4_ESM.pdf]

## Supplementary file 2

### Data charting form

|                   |                                                                                                                                                                                     |
|-------------------|-------------------------------------------------------------------------------------------------------------------------------------------------------------------------------------|
| <b>Record</b>     | Author(s)                                                                                                                                                                           |
|                   | Year                                                                                                                                                                                |
| <b>Policy</b>     | Country                                                                                                                                                                             |
|                   | World region (World Bank grouping) (126)                                                                                                                                            |
|                   | Country income (World Bank grouping) (126)                                                                                                                                          |
|                   | Disease                                                                                                                                                                             |
|                   | Non-government stakeholder or sector responsible for implementing policy (retail, agriculture, conservation, etc.)                                                                  |
|                   | Implementation date (start date, or range if the policy has been changed)                                                                                                           |
|                   | Intervention type                                                                                                                                                                   |
|                   | Location along spillover pathway adapted from Plowright et al. (8,22)                                                                                                               |
|                   | Policy level (local, national, regional, global)                                                                                                                                    |
|                   | Multi-sectoral initiative (Y/N)                                                                                                                                                     |
|                   | Government sector(s) responsible for policy                                                                                                                                         |
| <b>Evaluation</b> | Aim                                                                                                                                                                                 |
|                   | Evaluation type (formative, process, outcome, economic, impact (127))                                                                                                               |
|                   | Study design (for natural experiments, categorise using typology developed by Leatherdale (128))                                                                                    |
|                   | Theoretical framework and/or logic model underpinning evaluation (if described)                                                                                                     |
|                   | Period of observation                                                                                                                                                               |
|                   | Variables of interest: Outcome measure(s) and change in measure(s) (+/-/=) for quantitative impact evaluations; measures or observed variables or concepts for other types of study |
|                   | Consideration of unintended consequences (Y/N)                                                                                                                                      |
|                   | If yes, which unintended consequences? (e.g., economic outcomes, food security)                                                                                                     |
